# Supplementary material
Source: PubMed Central journal article supplement (PMC7339120)
Supplement: NIHMS1588763-supplement-1.pdf [file NIHMS1588763-supplement-1.pdf]

**Supplemental Fig. 1.** PND1 pup body weight negatively correlates to litter size. ( $R^2 \leq 0.05$ )

**Supplemental Fig. 2.** Variation of shape occurs in 3D reconstructed urogenital sinuses and colliculi. Representative 3D reconstruction of UGS and colliculi from vehicle controls, BPA treated, and ethinylestradiol exposed pups (upper panels), including urethra (red), colliculus (blue), cranial urethral lumen (orange), seminal vesicles (purple) and the anterior prostate (green). Note the variability of the cranial urethral lumen. The lower panels represent colliculi from different treatment groups. Note the variability of size and shape between treatments as well as within treatments (data not shown).

**Supplemental Fig. 3.** Pups from PND1 treated groups were immunostained for Estrogen Receptor  $\alpha$ , ER $\alpha$  (Protein Tech, 212441-1-AP, 1:400). Each column represents a different treatment group. Each row represents variability of immunostaining within treatment groups.

**Supplemental Fig. 4.** Pups from PND1 treated groups were immunostained for Androgen Receptor, AR (Santa Cruz, SC-816, 1:100). Each column represents a different treatment group. Each row represents variability of immunostaining within treatment groups.

**Supplemental Fig. 5.** Pups from PND1 treated groups were immunostained for Bone Morphogenetic Protein 4, BMP4 (Protein Tech, 12492-1-AP, 1:100). Each column represents a different treatment group. Each row represents variability of immunostaining within treatment groups.

**Supplemental Fig. 6.** Pups from PND1 treated groups were immunostained for Cytochrome P450, CYP11A1 (Protein Tech, 13363-1-AP, 1:100). Each column represents a different treatment group. Each row represents variability of immunostaining within treatment groups.

**Supplemental Fig. 7.** Pups from PND1 treated groups were immunostained for Aromatase, CYP19A1, (Abcam, ab18995, 1:125). Each column represents a different treatment group. Each row represents variability of immunostaining within treatment groups.

**Supplemental Fig. 8.** Pups from PND1 treated groups were immunostained for Dickkopf, DKK2 (Protein Tech, 21051-AP-1, 1:50). Each column represents a different treatment group. Each row represents variability of immunostaining within treatment groups.

**Supplemental Fig. 9.** Pups from PND1 treated groups were immunostained for Insulin-like Growth Factor-1, IGF-1 (Santa Cruz, SC-9013, 1:400). Each column represents a different treatment group. Each row represents variability of immunostaining within treatment groups.

**Supplemental Fig. 10.** Pups from PND1 treated groups were immunostained for Secreted Frizzled-Related Protein 4, SFRP4 (Protein Tech, 15328-1-AP, 1:800). Each column represents a different treatment group. Each row represents variability of immunostaining within treatment groups.

**Supplemental Fig. 11.** Pups from PND1 treated groups were immunostained for Thombospondin 2, Thbs2 (Bioss, bs-7524R, 1:100). Each column represents a different treatment group. Each row represents variability of immunostaining within treatment groups.

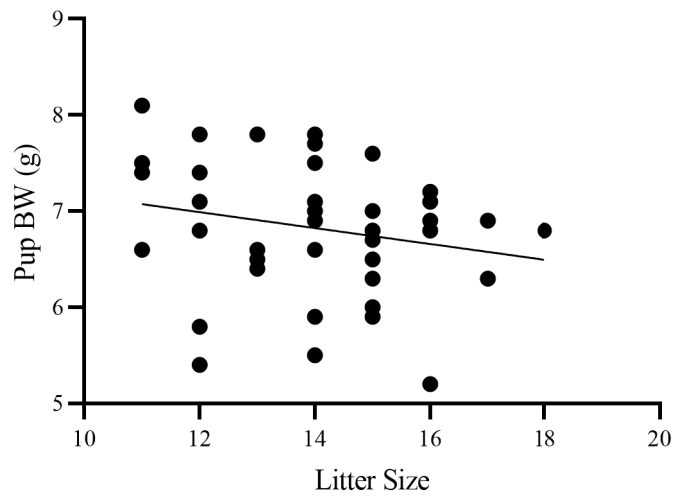

Supplemental Fig 1

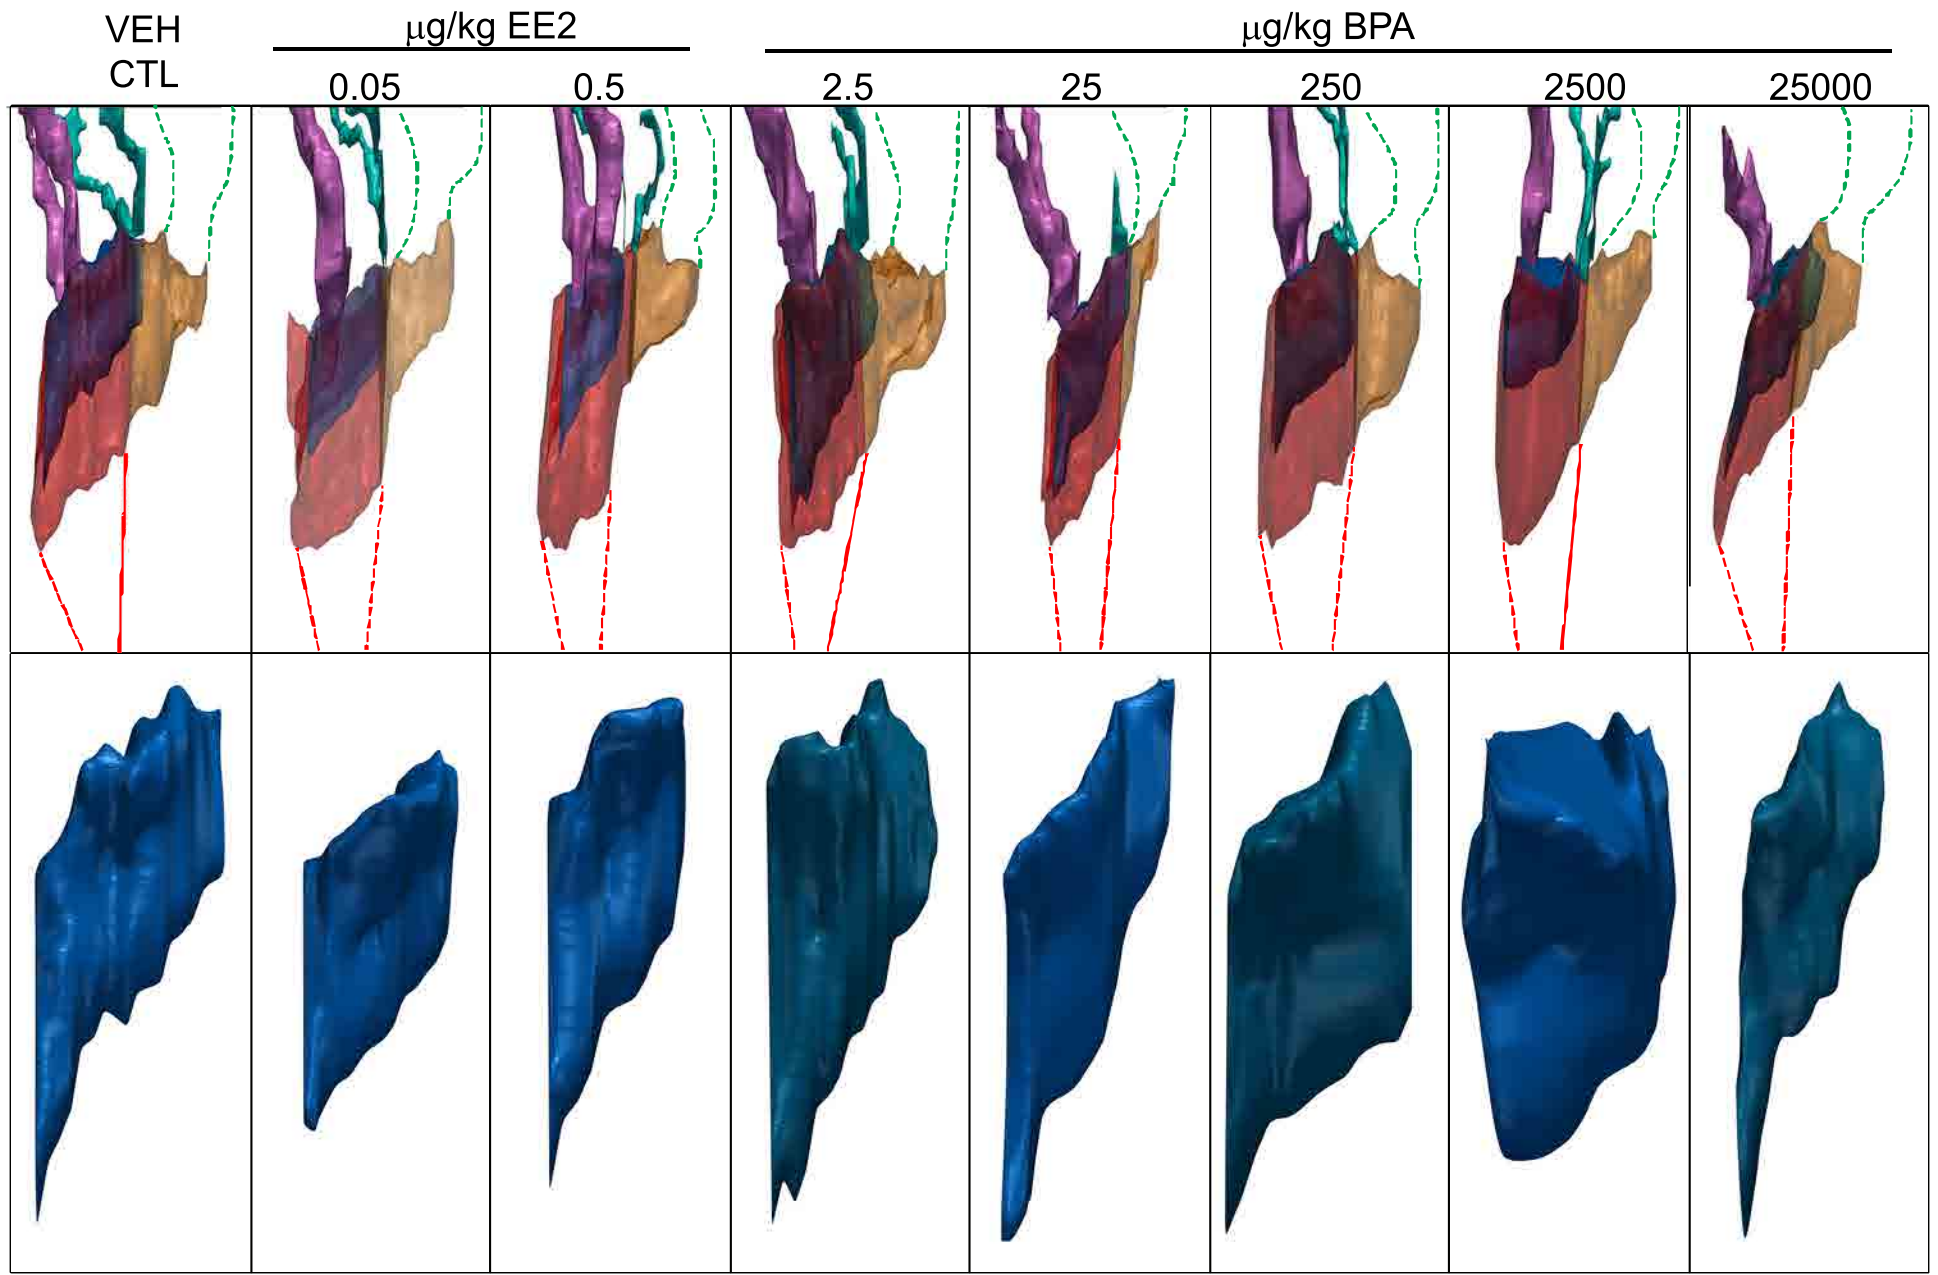

Supplemental Figure 2

# ER $\alpha$

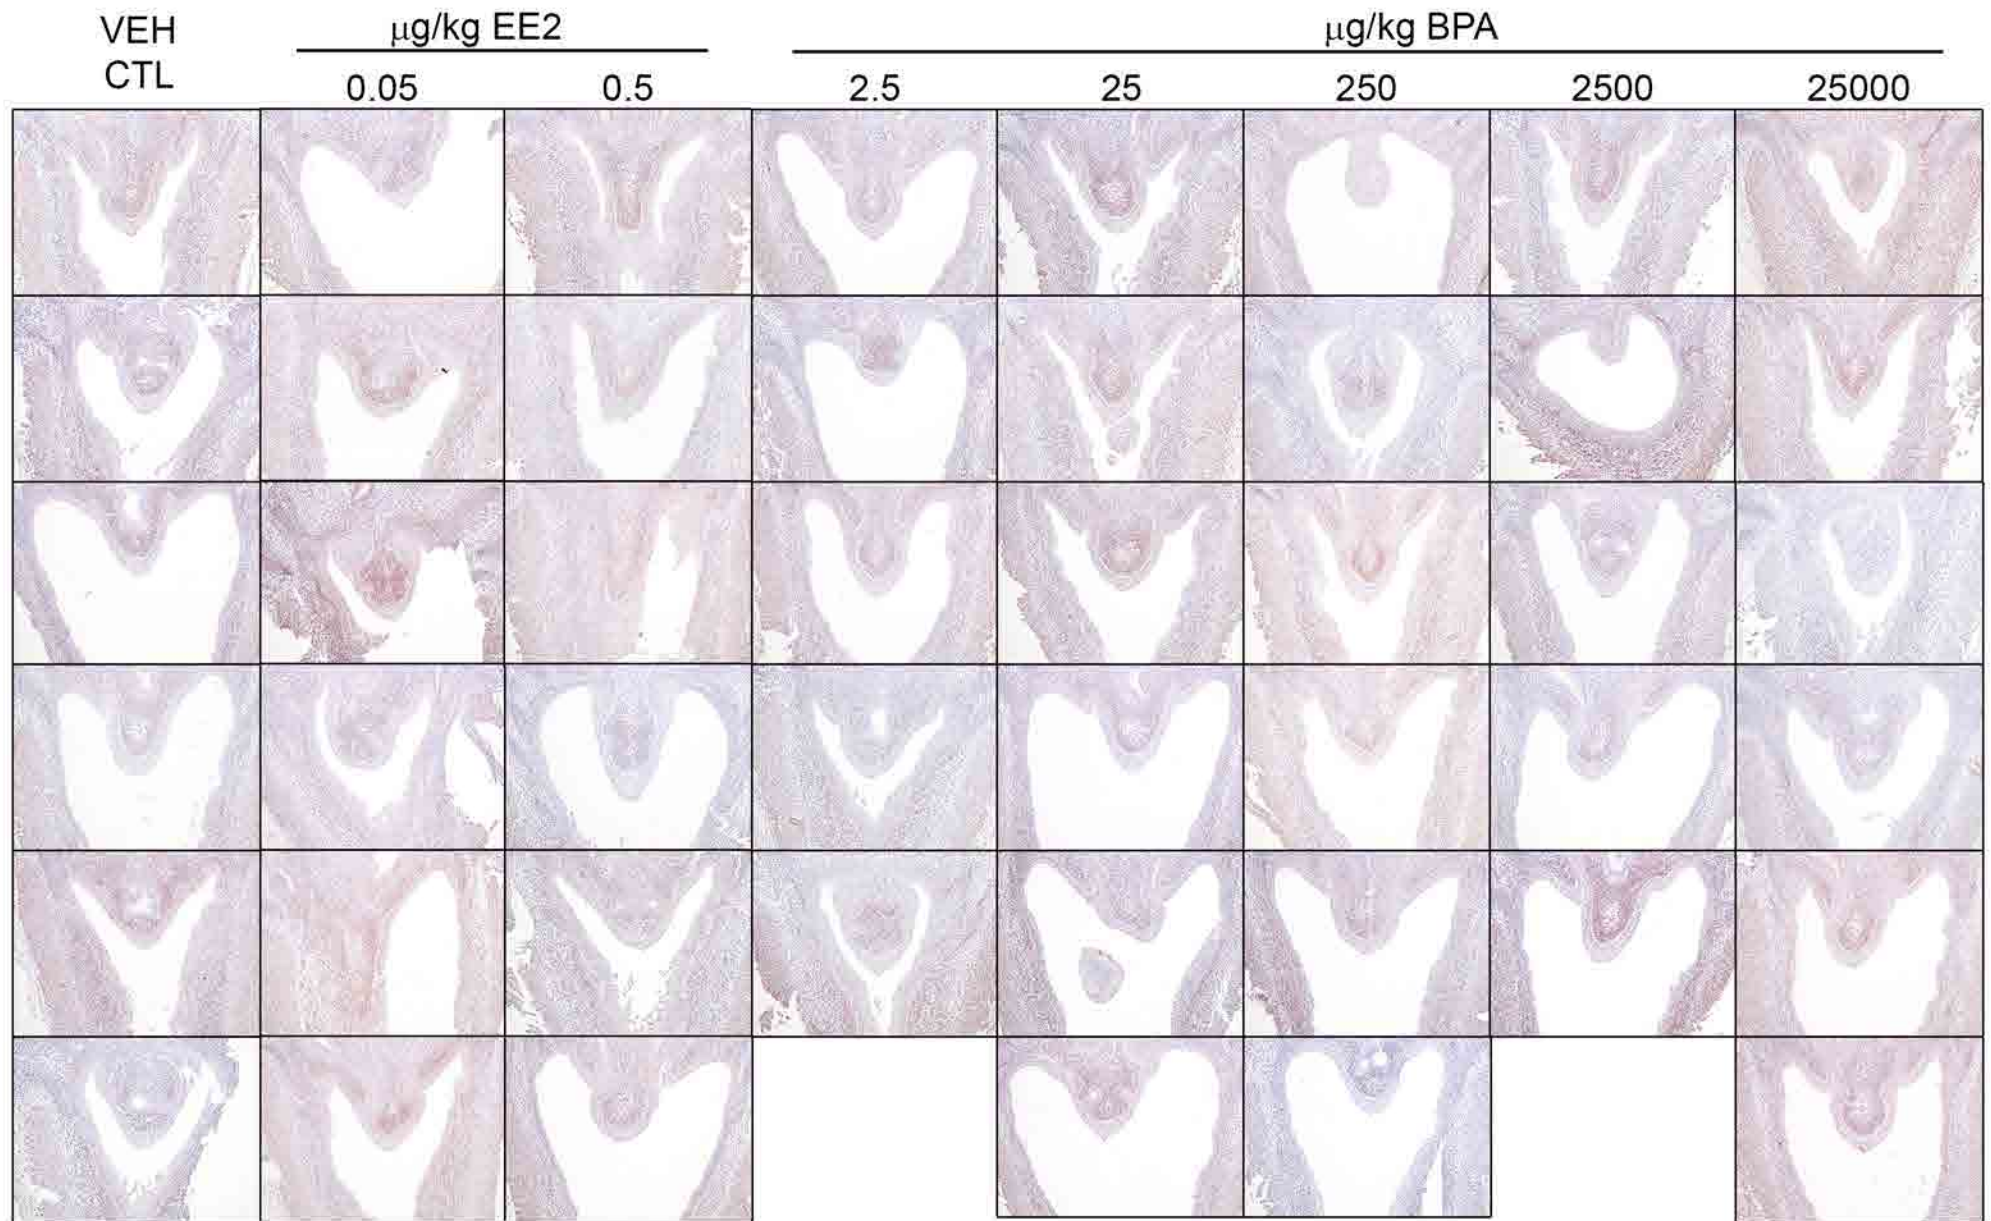

Supplemental Figure 3

# AR

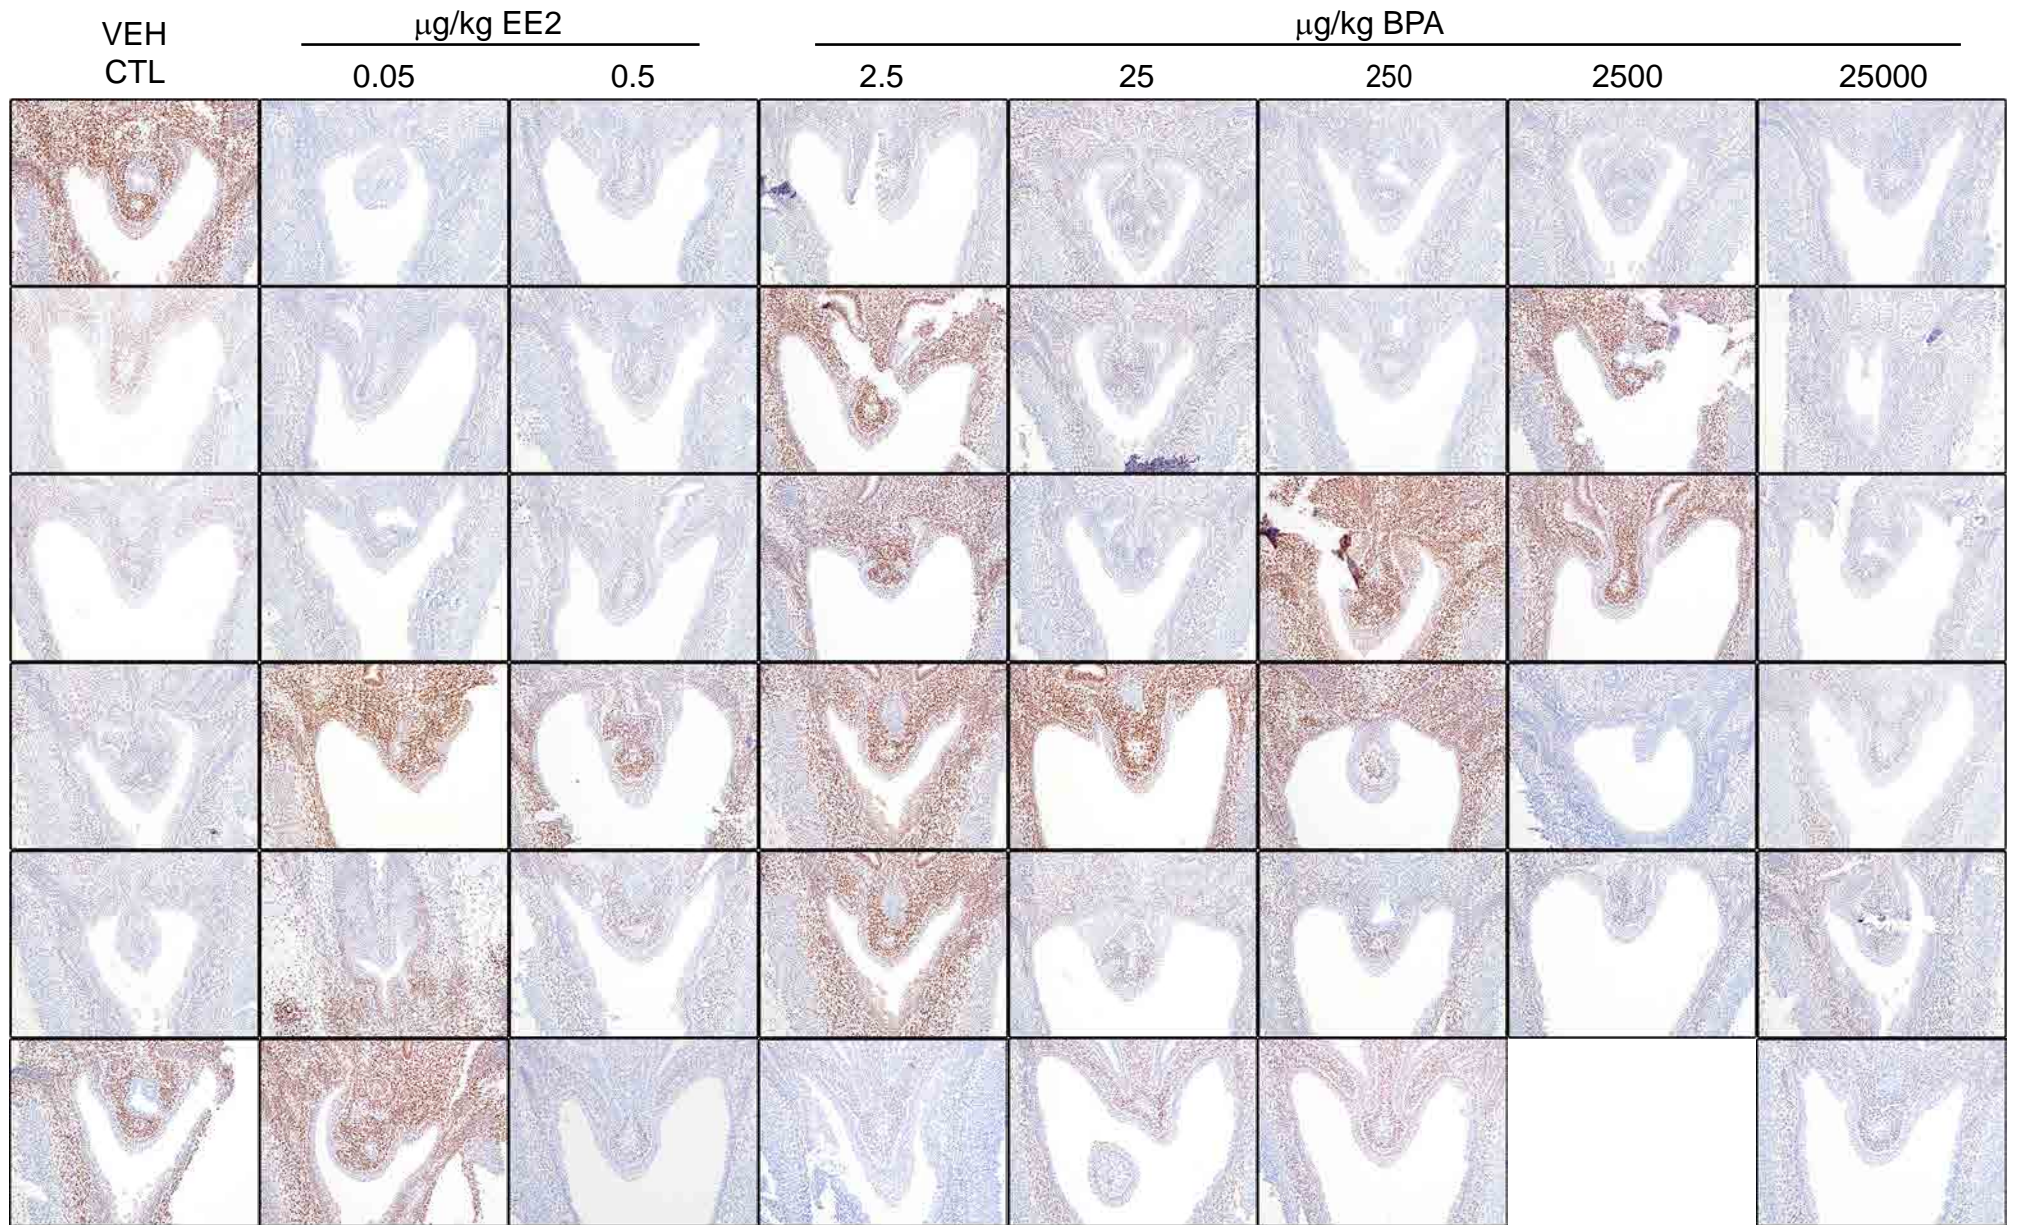

Supplemental Figure 4

# BMP4

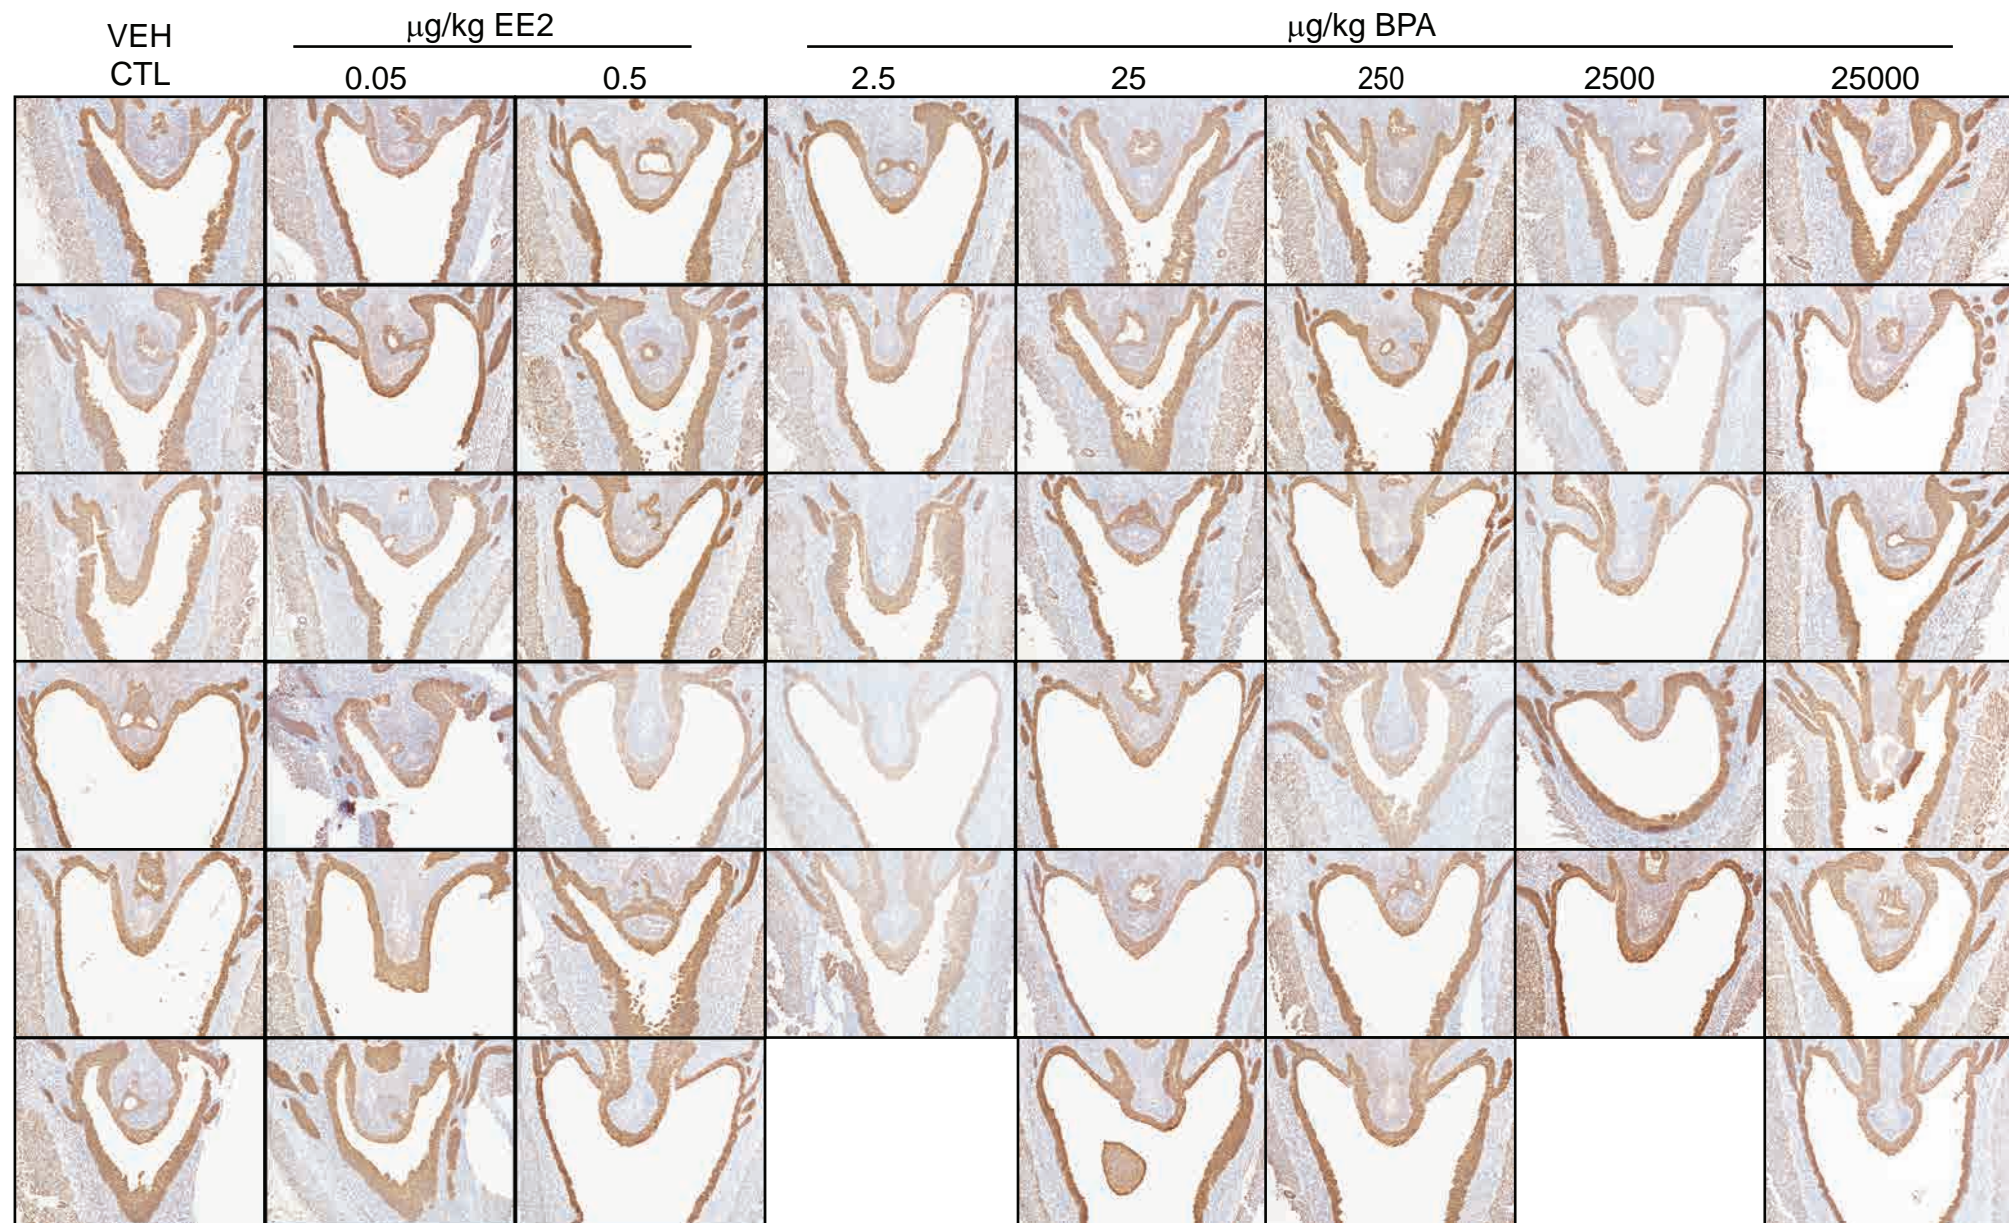

Supplemental Figure 5

# CYP11A1

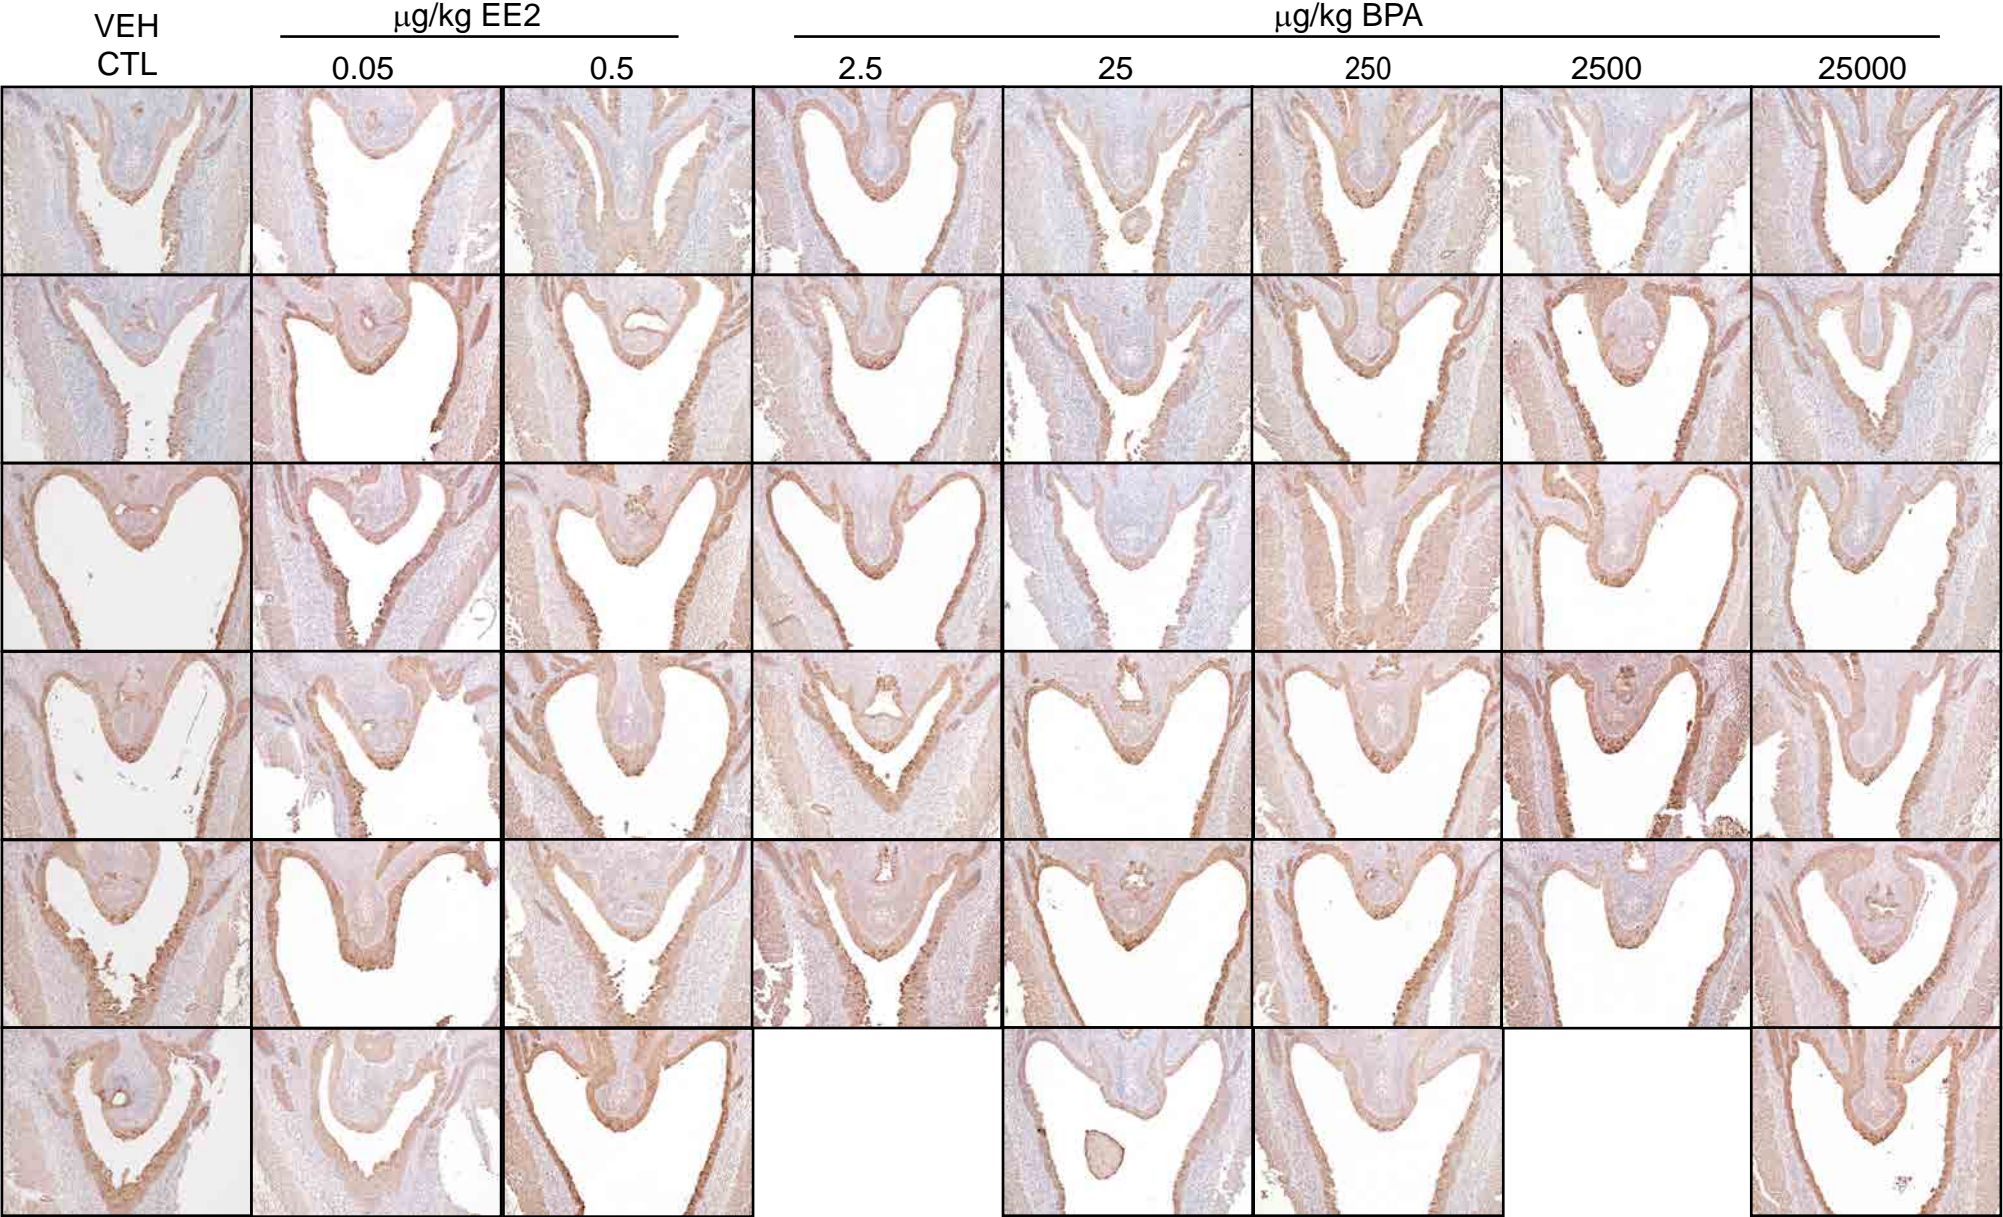

Supplemental Figure 6



# CYP19A1

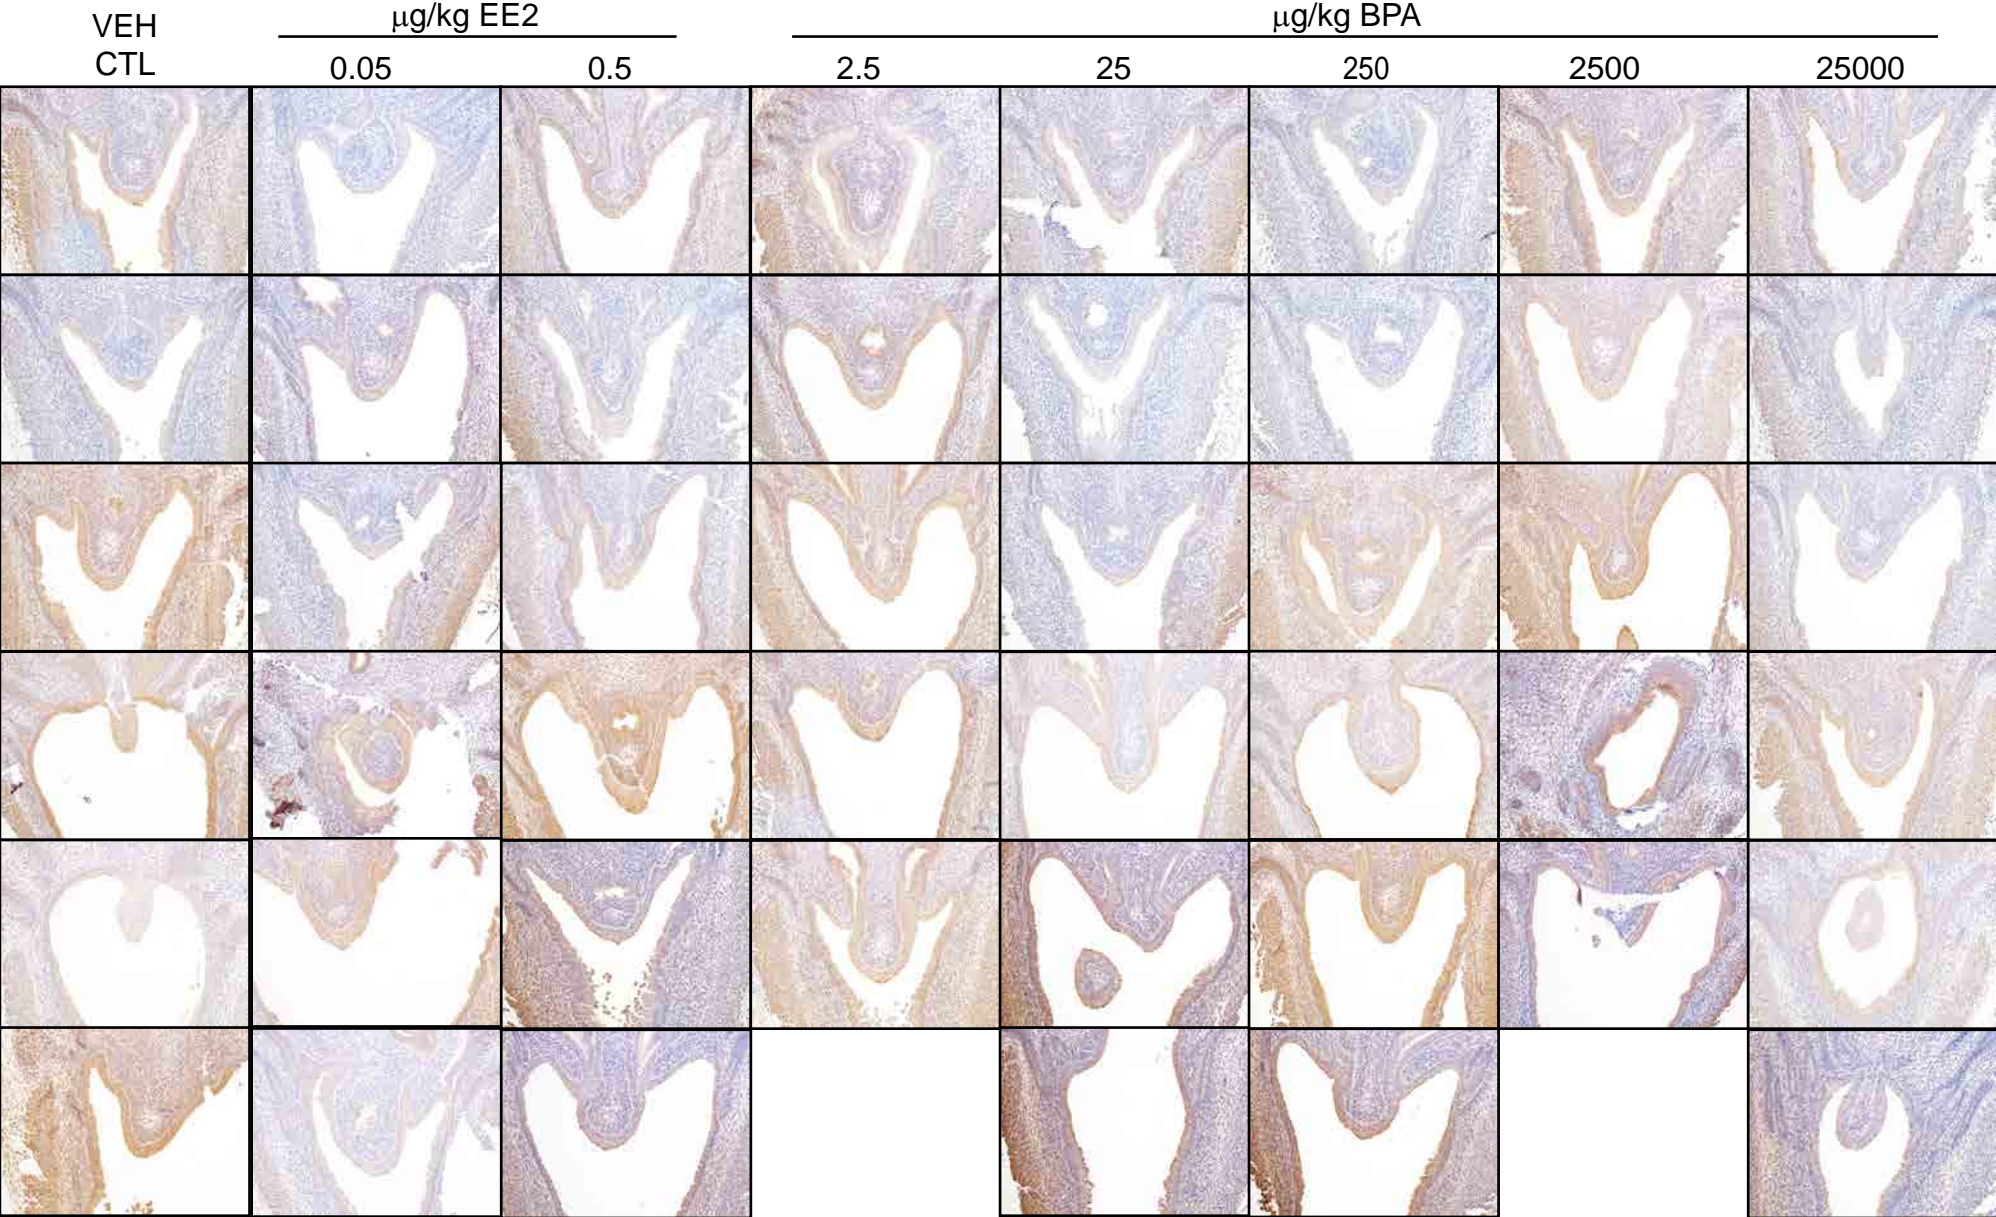

Supplemental Figure 7

# DKK2

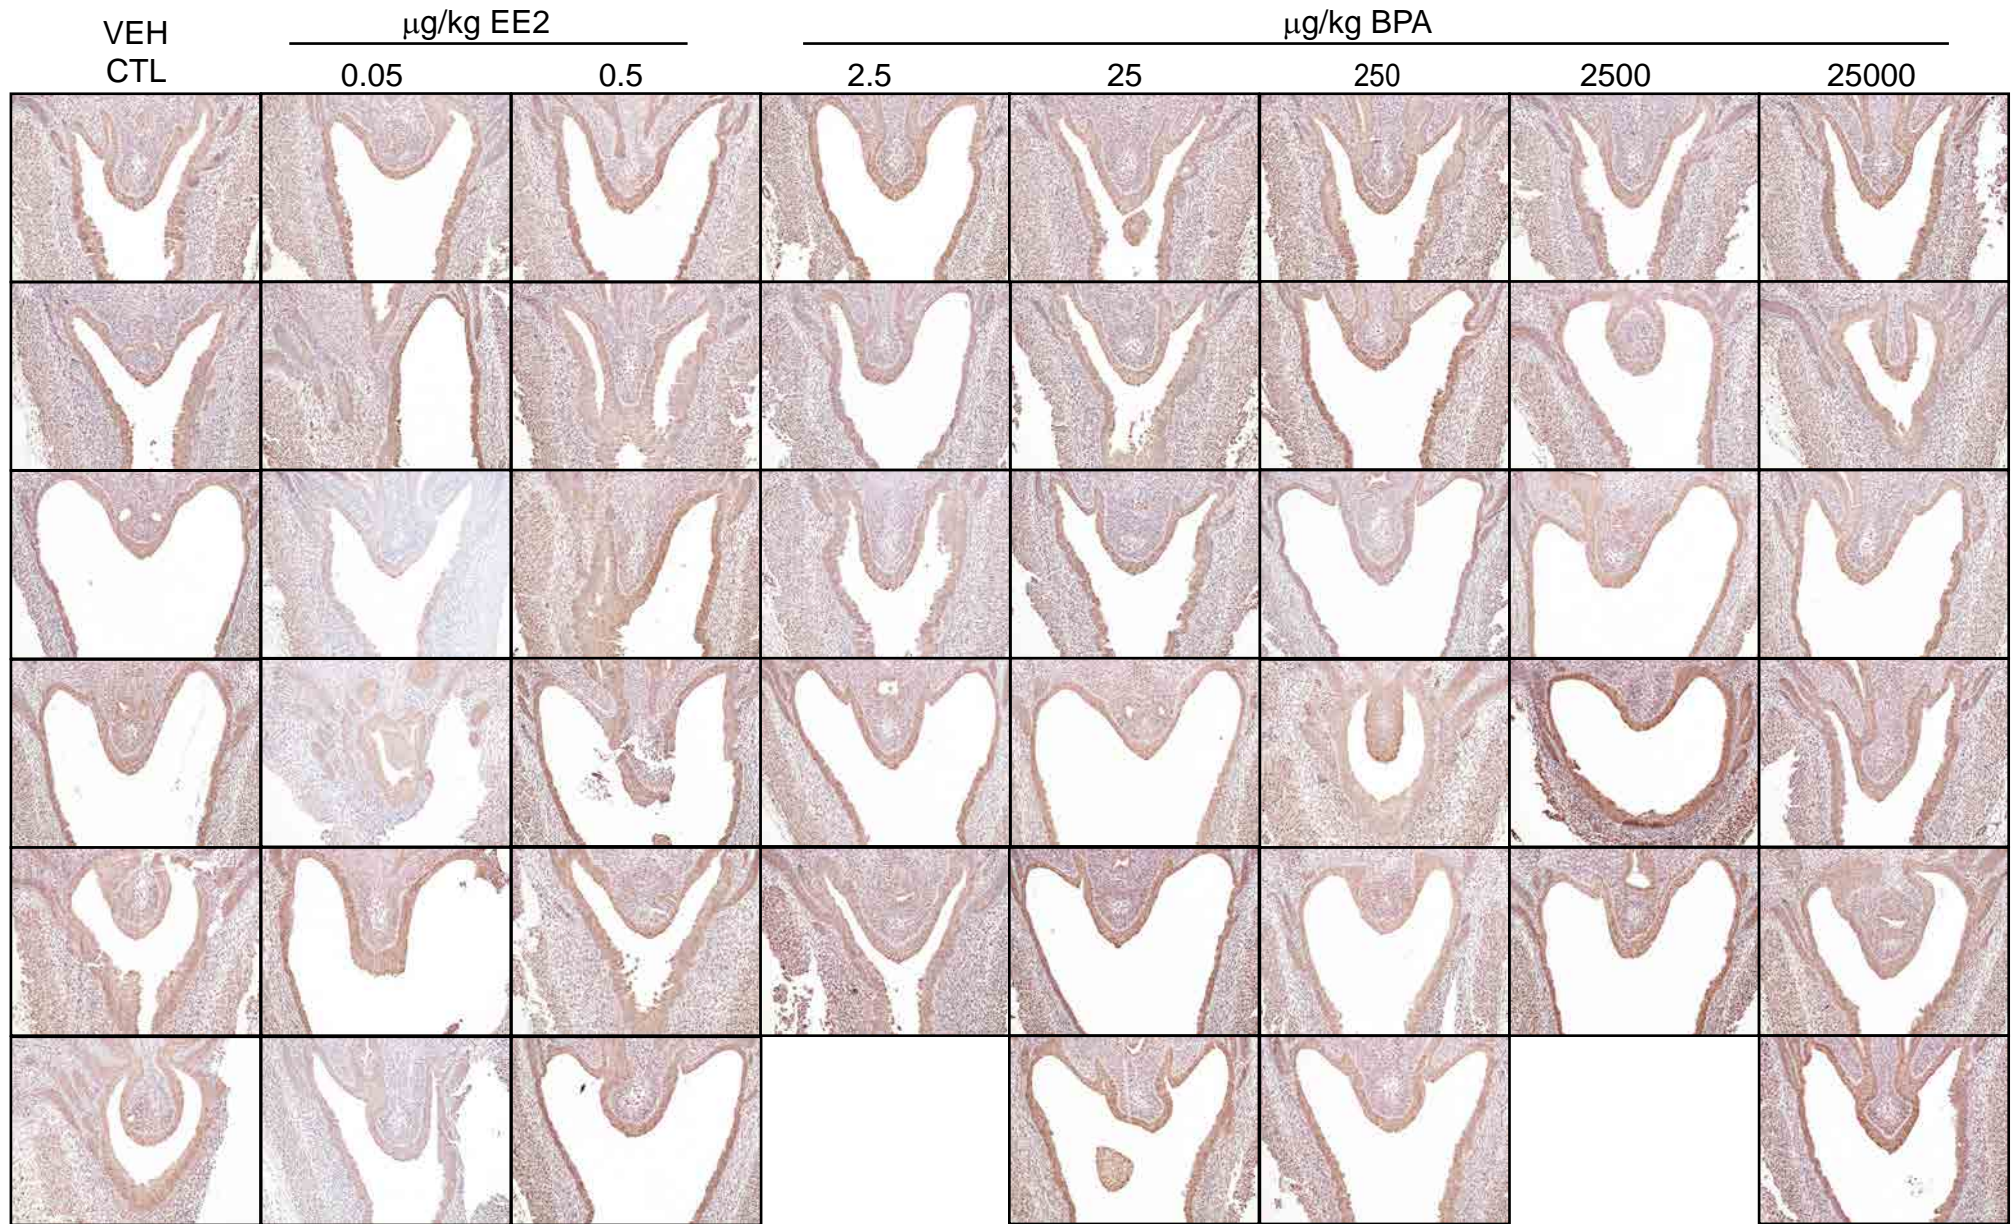

Supplemental Figure 8

# IGF-1

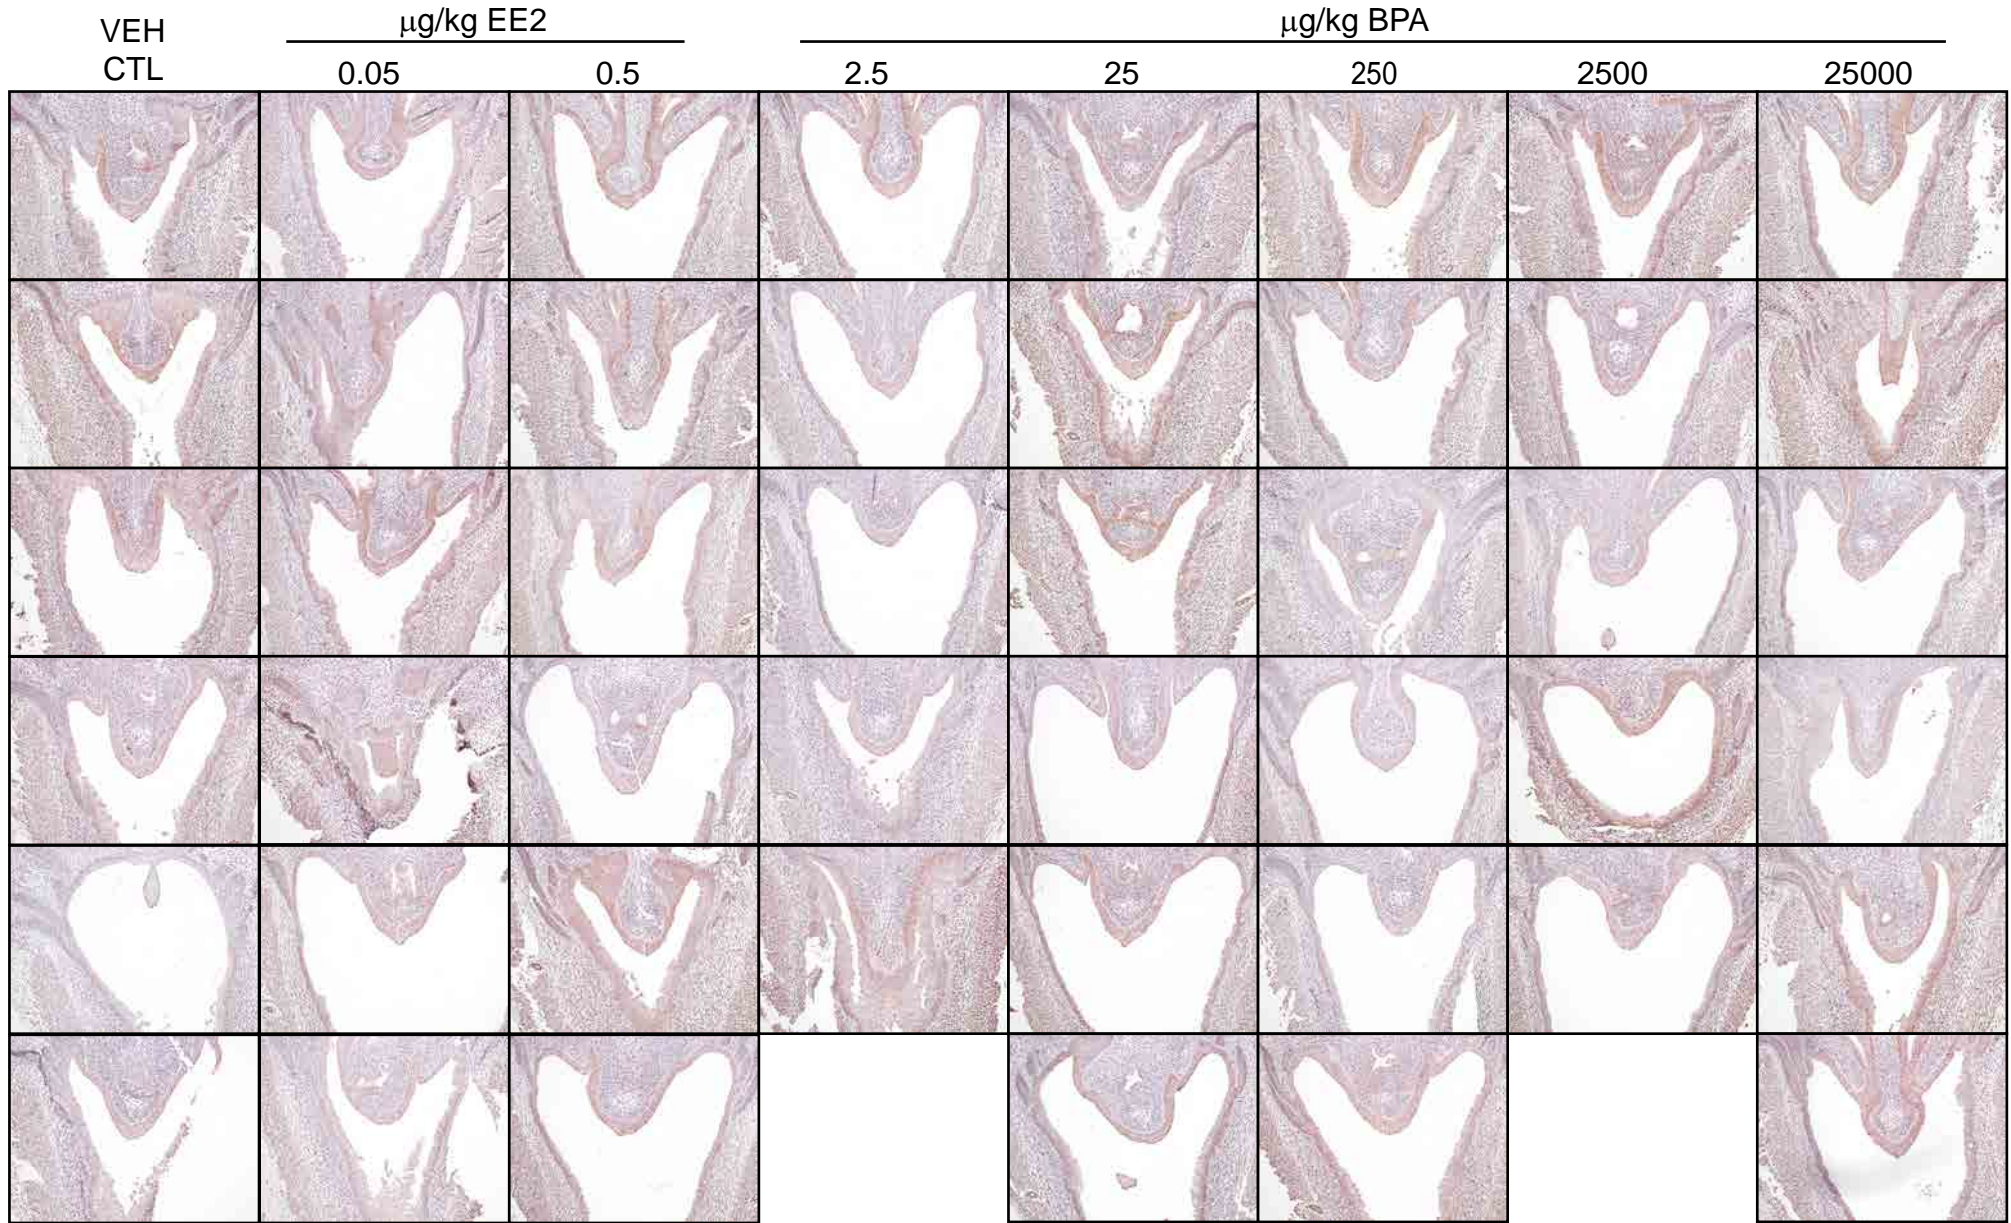

Supplemental Figure 9

# SFRP4

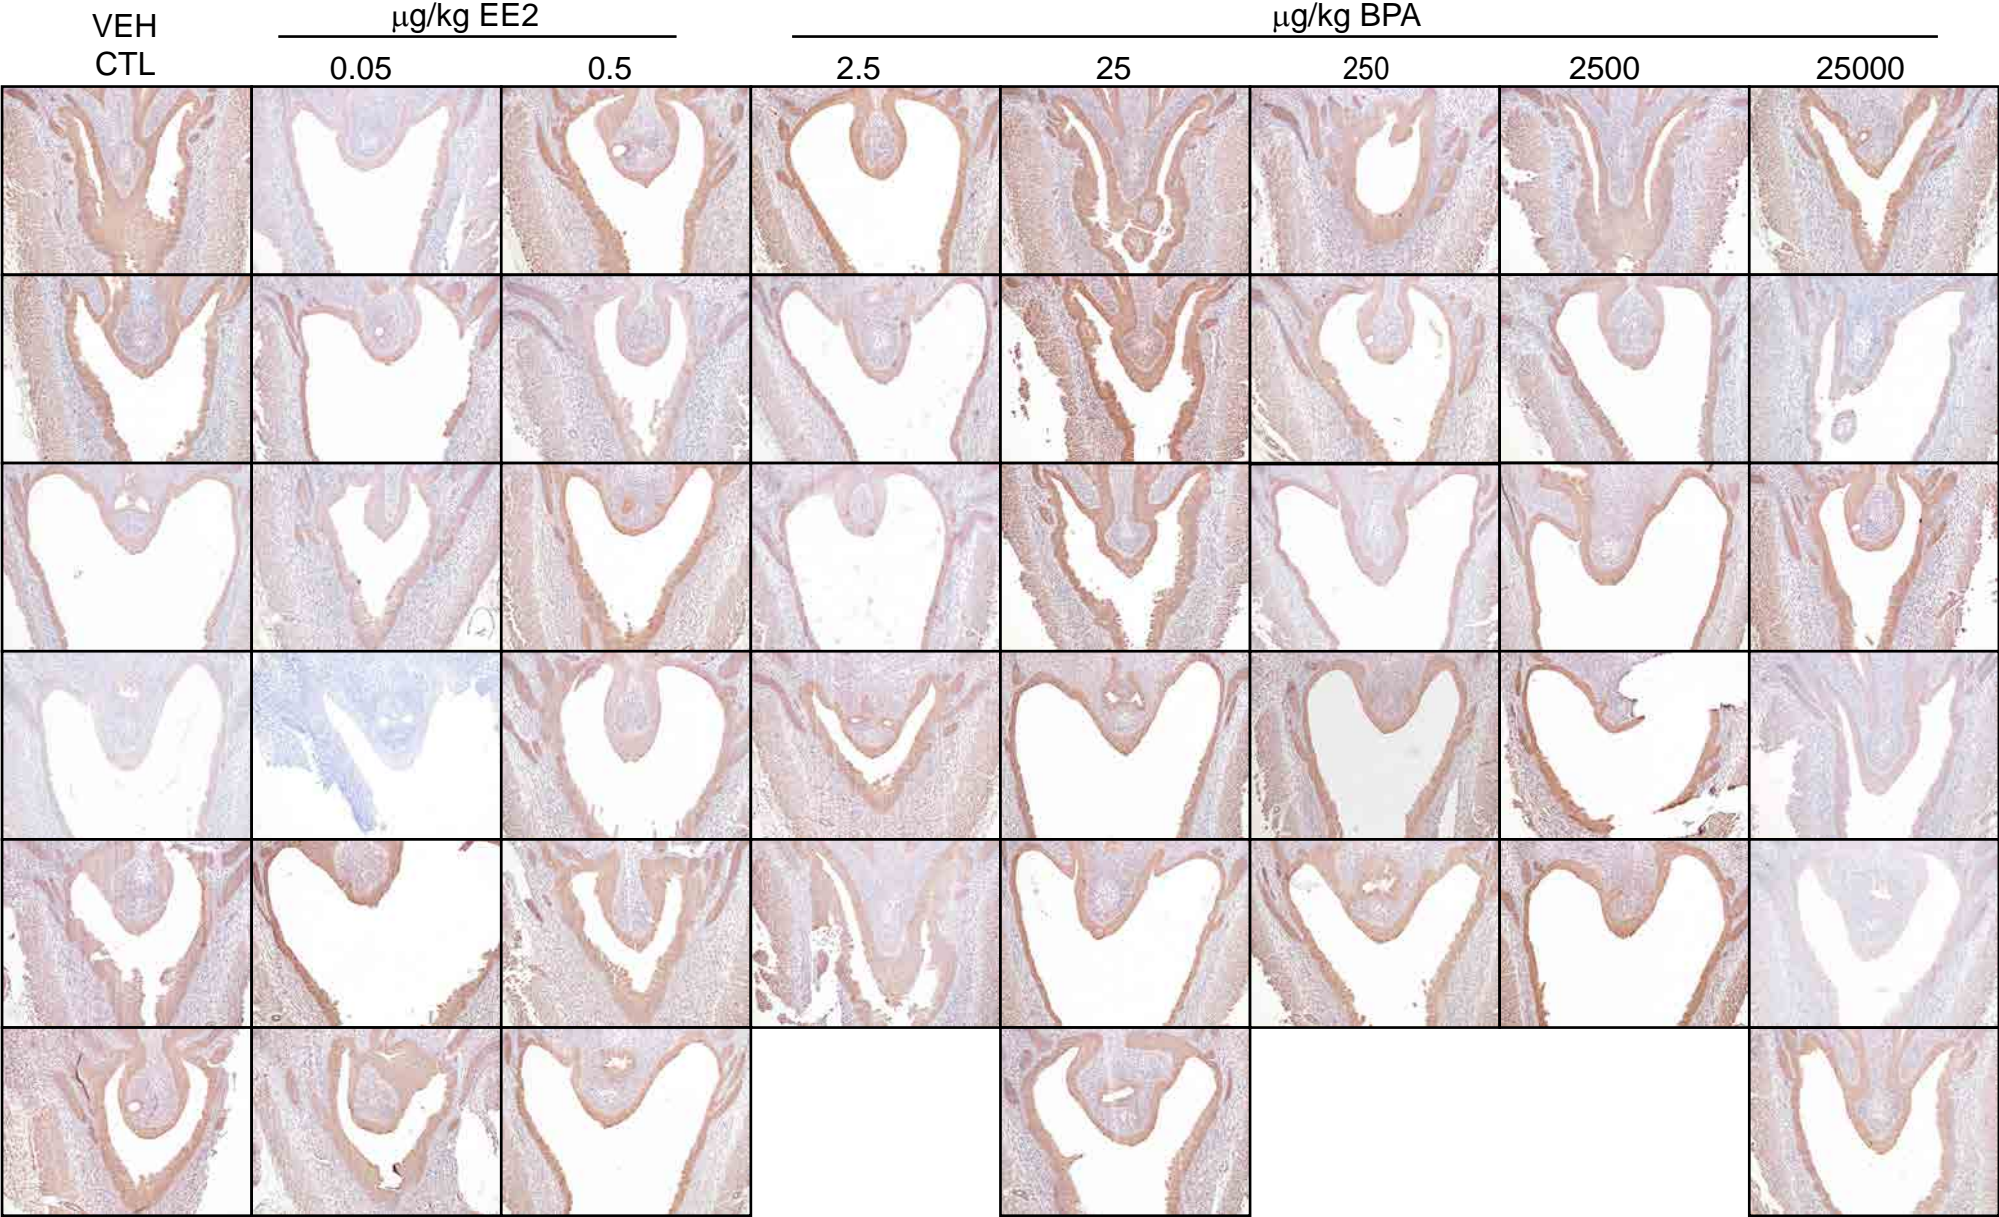

Supplemental Figure 10

# THBS2

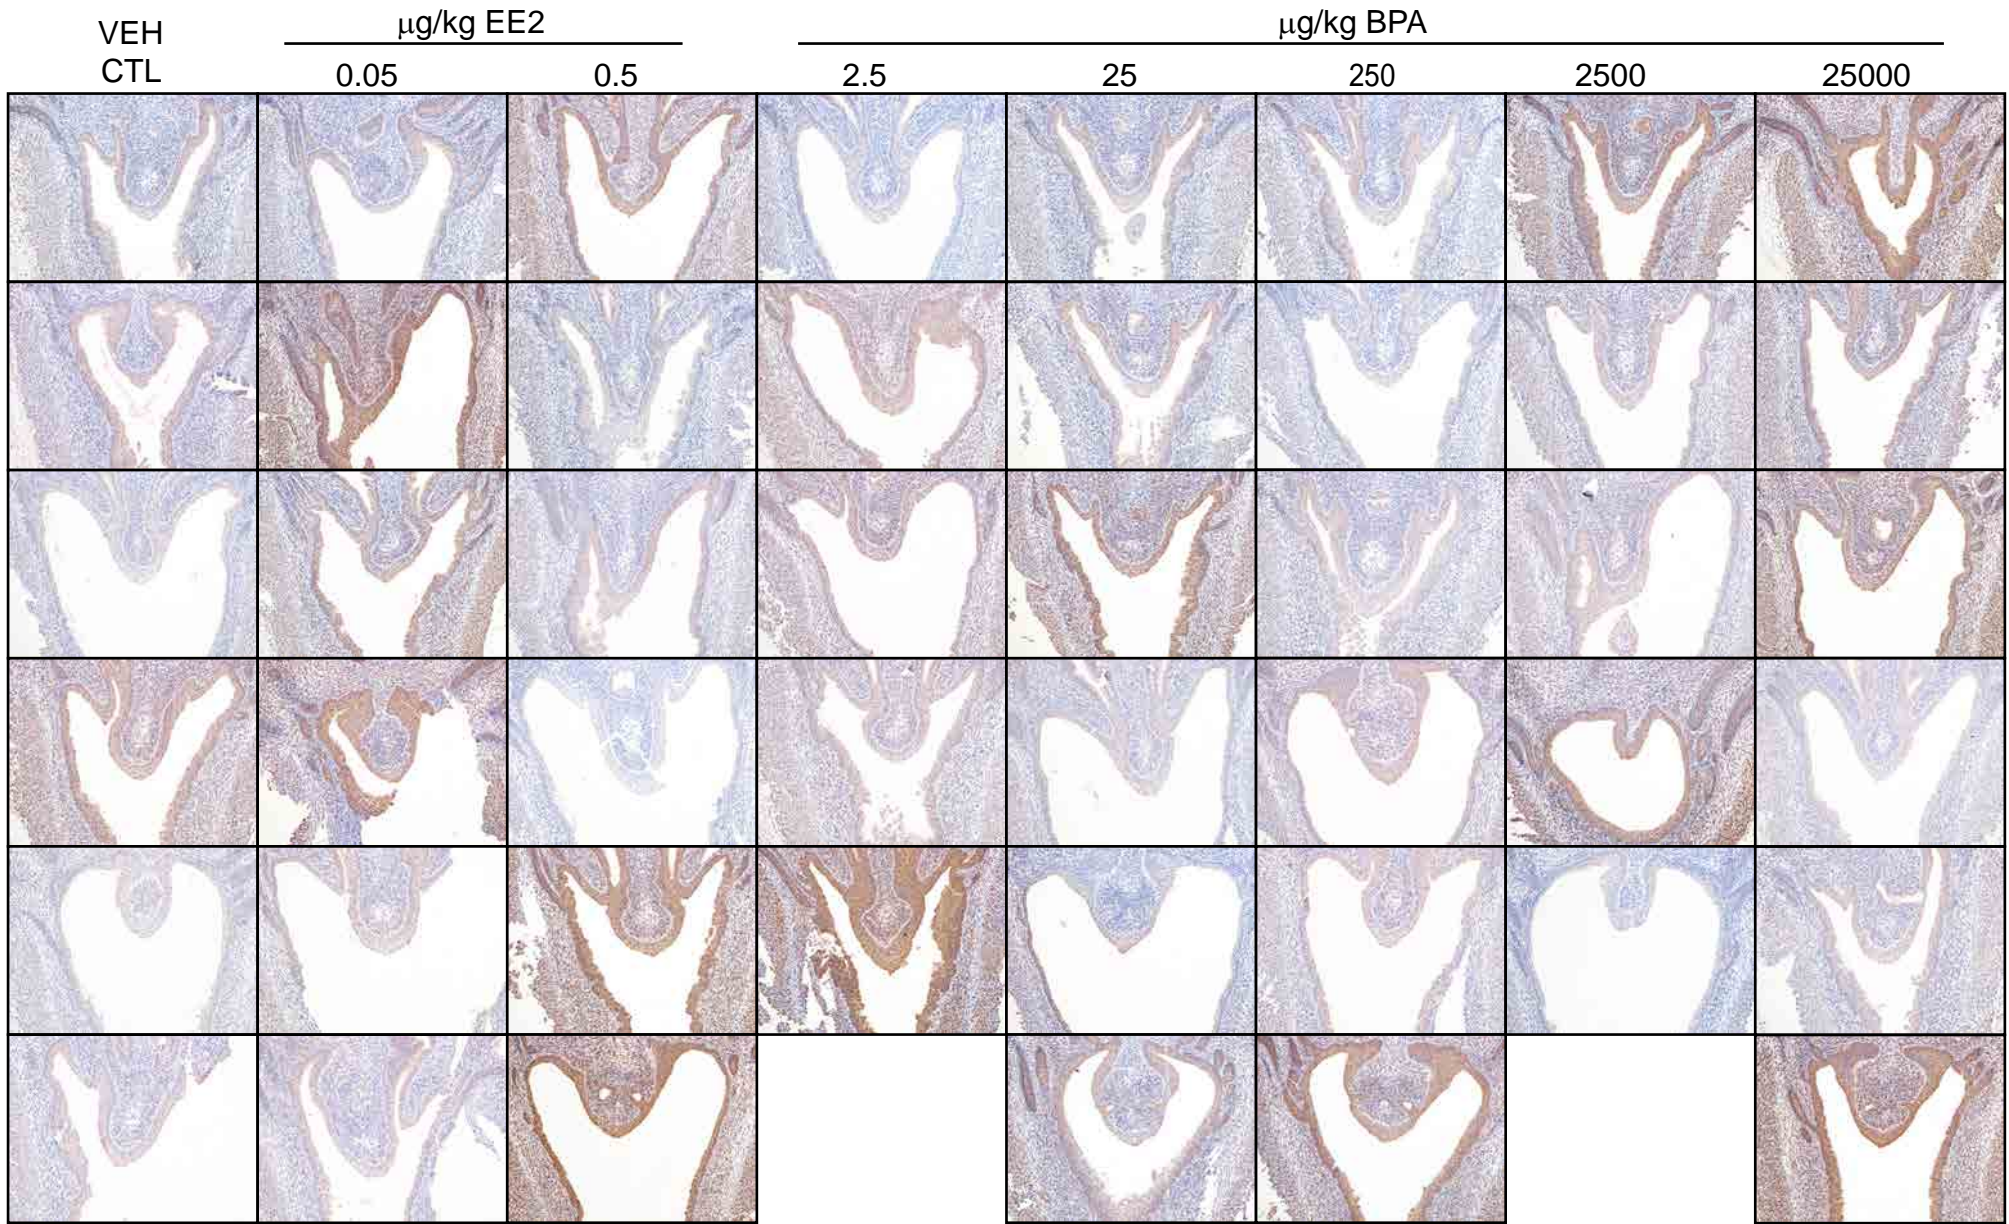

Supplemental Figure 11

**Supplemental Table 1: Antibodies used for immunohistochemical analysis in UGS from PND1 rats**

| <b>Antibody</b>                     | <b>Alt. Name</b> | <b>Company</b> | <b>Cat #</b> | <b>Dilution</b> | <b>Retrieval</b> | <b>Peroxide Block</b>              | <b>Background Block</b> | <b>Chromogen</b> |
|-------------------------------------|------------------|----------------|--------------|-----------------|------------------|------------------------------------|-------------------------|------------------|
| Androgen Receptor                   | AR               | Santa Cruz     | SC-816       | 1:100           | microwave        | 0.3% H <sub>2</sub> O <sub>2</sub> | 2.5% horse serum        | DAB              |
| Aromatase                           | CYP19A1          | abcam          | ab18995      | 1:125           | microwave        | 0.3% H <sub>2</sub> O <sub>2</sub> | 2.5% horse serum        | DAB              |
| Cytochrome P450                     | CYP11A1          | Protein Tech   | 13363-1-AP   | 1:100           | Decloaker        | Bloxall                            | Background Punisher     | DAB              |
| Bone Morphogenetic Protein 4        | BMP4             | Protein Tech   | 12492-1-AP   | 1:100           | Decloaker        | Bloxall                            | 2.5% horse serum        | DAB              |
| Dickkopf                            | DKK2             | Protein Tech   | 21051-AP-1   | 1:50            | Decloaker        | Bloxall                            | Background Punisher     | DAB              |
| Estrogen Receptor 1                 | ER $\alpha$      | Protein Tech   | 21244-1-AP   | 1:400           | Decloaker        | Bloxall                            | Background Punisher     | DAB              |
| Insulin-like Growth Factor-1        | IGF-1            | Santa Cruz     | SC-9013      | 1:400           | Decloaker        | Bloxall                            | 2.5% horse serum        | DAB              |
| Thrombospondin 2                    | Thbs2            | Bioss          | bs-7524R     | 1:100           | microwave        | 0.3% H <sub>2</sub> O <sub>2</sub> | 2.5% horse serum        | DAB              |
| Secreted Frizzled-Related Protein 4 | SFRP4            | Protein Tech   | 15328-1-AP   | 1:800           | Decloaker        | Bloxall                            | Background Punisher     | DAB              |

**Supplemental Table 2. Criteria for body and urogenital sinus measurements**

| Measurement Taken                                                                     | Method Description                                                                                                                                                                   |
|---------------------------------------------------------------------------------------|--------------------------------------------------------------------------------------------------------------------------------------------------------------------------------------|
| Body weight <b>BW</b> (g)                                                             | Mass of pup using balance                                                                                                                                                            |
| Colliculus angle <b>C<sub>A</sub></b>                                                 | Average of 3 repeated measures taken of the angle which the 3D reconstructed colliculus (blue) makes with the cranial urethral lumen (orange)                                        |
| Colliculus volume <b>C<sub>V</sub></b> ( $\mu\text{M}^3 \times 10^4$ )                | 3D reconstructed colliculus (blue) volume calculated by BioVis3D                                                                                                                     |
| Colliculus surface area <b>C<sub>S</sub></b> ( $\mu\text{M}^2 \times 10^4$ )          | 3D reconstructed colliculus (blue) surface area calculated by BioVis3D                                                                                                               |
| Cranial urethral distance <b>CU<sub>D</sub></b> ( $\mu\text{M}$ )                     | Distance measured from the most cranial point of the cranial urethral lumen across to where the AP (teal) branch from the cranial urethral lumen (orange)                            |
| Cranial urethral length, cranial to caudal <b>CU<sub>L</sub></b> ( $\mu\text{M}$ )    | Distance measured from the most cranial point of the cranial urethral lumen to the most caudal point of the cranial urethral lumen (orange)                                          |
| Cranial urethral lower angle <b>CU<sub>LA</sub></b>                                   | Average of 3 repeated measures taken of the angle made from where the AP (teal) branch, down caudally and back up to the most cranial point of the cranial urethral lumen (orange)   |
| Cranial urethral surface area <b>CU<sub>S</sub></b> ( $\mu\text{M}^2 \times 10^4$ )   | 3D reconstructed cranial urethral lumen surface area (ventral to where the AP branch) calculated by BioVis3D                                                                         |
| Cranial urethral upper angle <b>CU<sub>UA</sub></b>                                   | Average of 3 repeated measures taken of the angle made from the most cranial point of the cranial urethral lumen (orange), over to where the AP (teal) last branch and down caudally |
| Cranial urethral volume <b>CU<sub>V</sub></b> ( $\mu\text{M}^3 \times 10^4$ )         | 3D reconstructed cranial urethral lumen volume (ventral to where the AP branch) calculated by BioVis3D                                                                               |
| Cranial urethral width, dorsal to ventral <b>CU<sub>W</sub></b> ( $\mu\text{M}$ )     | Distance measured from the most dorsal point of the cranial urethral lumen to the most ventral point of the cranial urethral lumen (orange)                                          |
| <b>MIDWAY SECTION NUMBER</b>                                                          | Section midway between where the AP ducts first connect to urethral lumen and where the bladder first connects to the urethral lumen                                                 |
| Midway colliculus distance <b>Midway C<sub>D</sub></b> ( $\mu\text{M}$ )              | Distance measured between the lowest caudal point of the colliculus (blue) to the lowest caudal point drawn of the urethral lumen on the midway section                              |
| Midway colliculus size <b>Midway C<sub>S</sub></b> ( $\mu\text{M}$ )                  | Calculated as the reciprocal of $C_D \times 1000$                                                                                                                                    |
| Midway luminal area <b>Midway L<sub>A</sub></b> ( $\mu\text{M}^2 \times 10^2$ )       | Area measured inside the urothelium on the midway section (black outline)                                                                                                            |
| Midway luminal perimeter <b>Midway L<sub>P</sub></b> ( $\mu\text{M} \times 10^2$ )    | Perimeter measured inside the urothelium on the midway section (black outline)                                                                                                       |
| Midway urethral area <b>Midway U<sub>A</sub></b> ( $\mu\text{M}^2 \times 10^2$ )      | Area measured around the p63 positive urothelium on the midway section (red outline)                                                                                                 |
| Midway urothelium area <b>Midway UE<sub>A</sub></b> ( $\mu\text{M}^2 \times 10^2$ )   | Calculated by subtracting the luminal area (black outline) from the urethral area (red outline) on the midway section                                                                |
| Midway urothelium thickness <b>Midway UE<sub>T</sub></b> ( $\mu\text{M}$ )            | Average of 2 urothelium (p63 positive) thicknesses of the left and right lateral sides at the widest point of the urethra on the midway section                                      |
| Midway urethral perimeter <b>Midway U<sub>P</sub></b> ( $\mu\text{M} \times 10^2$ )   | Perimeter measured around the p63 positive urothelium (red outline) on the midway section                                                                                            |
| Midway urethral lateral width <b>Midway U<sub>LW</sub></b> ( $\mu\text{M}$ )          | Measure at the widest lateral point of the p63 positive urothelium (green line) on the midway section                                                                                |
| Prostatic urethral surface area <b>PU<sub>S</sub></b> ( $\mu\text{M}^2 \times 10^4$ ) | 3D reconstructed prostatic urethral lumen surface area (dorsal to where the AP branch) calculated by BioVis3D (red)                                                                  |
| Prostatic urethral volume <b>PU<sub>V</sub></b> ( $\mu\text{M}^3 \times 10^4$ )       | 3D reconstructed prostatic urethral lumen volume (dorsal to where the AP branch) calculated by BioVis3D (red)                                                                        |
| Urethral length, cranial to caudal <b>U<sub>L</sub></b> ( $\mu\text{M}$ )             | Distance measured from the most cranial point of the cranial urethral lumen (orange) to the most caudal point of the prostatic urethral lumen (red)                                  |
| Urethral surface area <b>U<sub>S</sub></b> ( $\mu\text{M}^2 \times 10^4$ )            | Entire 3D reconstructed urethral lumen surface area calculated by BioVis3D (red + orange)                                                                                            |
| Urethral volume <b>U<sub>V</sub></b> ( $\mu\text{M}^3 \times 10^4$ )                  | Entire 3D reconstructed urethral lumen volume calculated by BioVis3D (red + orange)                                                                                                  |
| Urethral width, dorsal to ventral <b>U<sub>W</sub></b> ( $\mu\text{M}$ )              | Distance measured from the most dorsal point of the prostatic urethral lumen (red) to the most ventral point of the cranial urethral lumen (orange)                                  |
| <b>WIDEST SECTION NUMBER</b>                                                          | Section with the widest lateral width when looking down cranially at the 3D reconstructed urethral lumen                                                                             |
| Widest colliculus distance <b>Widest C<sub>D</sub></b> ( $\mu\text{M}$ )              | Distance measured between the lowest caudal point of the colliculus (blue) to the lowest caudal point drawn of the urethral lumen on the widest section                              |
| Widest colliculus size <b>Widest C<sub>S</sub></b> ( $\mu\text{M}$ )                  | Calculated as the reciprocal of $C_D \times 1000$                                                                                                                                    |
| Widest luminal area <b>Widest L<sub>A</sub></b> ( $\mu\text{M}^2 \times 10^2$ )       | Area measured inside the urothelium on the widest section (black outline)                                                                                                            |
| Widest luminal perimeter <b>Widest L<sub>P</sub></b> ( $\mu\text{M} \times 10^2$ )    | Perimeter measured inside the urothelium on the widest section (black outline)                                                                                                       |
| Widest urethral area <b>Widest U<sub>A</sub></b> ( $\mu\text{M}^2 \times 10^2$ )      | Area measured around the p63 positive urothelium on the widest section (red outline)                                                                                                 |
| Widest urothelium area <b>Widest UE<sub>A</sub></b> ( $\mu\text{M}^2 \times 10^2$ )   | Calculated by subtracting the luminal area (black outline) from the urethral area (red outline) on the widest section                                                                |
| Widest urothelium thickness <b>Widest UE<sub>T</sub></b> ( $\mu\text{M}$ )            | Average of 2 urothelium (p63 positive) thicknesses of the left and right lateral sides at the widest point of the urethra on the widest section                                      |
| Widest urethral perimeter <b>Widest U<sub>P</sub></b> ( $\mu\text{M} \times 10^2$ )   | Perimeter measured around the p63 positive urothelium (red outline) on the widest section                                                                                            |
| Widest urethral lateral width <b>Widest U<sub>LW</sub></b> ( $\mu\text{M}$ )          | Measure at the widest lateral point of the p63 positive urothelium (green line) on the widest section                                                                                |

**Supplemental Table 3: Effects of BPA on the urogenital sinus**

|                                                                                           | VEH CTL        | µg/kg BPA          |                   |                   |                  |               | µg/kg EE2          |                     |
|-------------------------------------------------------------------------------------------|----------------|--------------------|-------------------|-------------------|------------------|---------------|--------------------|---------------------|
|                                                                                           |                | 2.5                | 25                | 250               | 2500             | 25000         | 0.05               | 0.5                 |
| Body weight BW (g)                                                                        | 6.1 (0.3)      | <b>7.0 (0.4)</b>   | <b>7.0 (0.2)</b>  | <b>7.2 (0.2)</b>  | 6.4 (0.2)        | 6.7 (0.4)     | <b>6.9 (0.1)</b>   | <b>7.0 (0.3)</b>    |
| Colliculus angle C <sub>A</sub>                                                           | 25.1 (1.3)     | <b>21.2 (1.1)</b>  | <b>21.3 (0.7)</b> | <b>20.7 (1)</b>   | 23 (0.9)         | 22 (1.8)      | <b>19.7 (0.7)</b>  | 22 (1.3)            |
| Colliculus volume C <sub>v</sub> (µM <sup>3</sup> x10 <sup>4</sup> )                      | 283.4 (30.7)   | 270.3 (24.2)       | 231.6 (22.6)      | 258.6 (16.7)      | 217.2 (33.6)     | 256.7 (27)    | 225 (44.5)         | 257.6 (41.6)        |
| Colliculus surface area C <sub>s</sub> (µM <sup>2</sup> x10 <sup>4</sup> )                | 8.5 (0.7)      | 7.7 (0.5)          | 6.9 (0.5)         | 7.2 (0.4)         | 6.8 (0.7)        | 7.2 (0.8)     | 6.6 (0.9)          | 7.7 (1)             |
| Cranial urethral distance CU <sub>b</sub> (µM)                                            | 39.5 (5.4)     | 32.9 (2.7)         | 36 (3.8)          | 33 (5.9)          | 32.9 (1.9)       | 33.2 (3.6)    | 32.8 (4.7)         | 26.5 (3.4)          |
| Cranial urethral length, cranial to caudal CU <sub>l</sub> (µM)                           | 103.3 (6.1)    | <b>77.1 (10.8)</b> | 97.5 (5.2)        | <i>86.1 (5.6)</i> | 99.1 (6)         | 97.5 (4.2)    | 85.3 (10.9)        | 87.4 (8)            |
| Cranial urethral lower angle CU <sub>LA</sub>                                             | 3.1 (0.4)      | 3.6 (0.9)          | 2.1 (0.4)         | 2.9 (0.7)         | 2.7 (0.3)        | 2.6 (0.5)     | 3.2 (1)            | 2.7 (0.6)           |
| Cranial urethral surface area CU <sub>s</sub> (µM <sup>2</sup> x10 <sup>4</sup> )         | 8.8 (1.4)      | 8.7 (1.6)          | 7.6 (1.4)         | 7.8 (1.3)         | 10.7 (2.1)       | 8 (0.8)       | 7.9 (1.1)          | 8.1 (1.5)           |
| Cranial urethral upper angle CU <sub>UA</sub>                                             | 14.9 (2.2)     | 12.7 (1.1)         | 15 (3.2)          | 13.1 (2)          | 16.5 (1.9)       | 12.8 (2.3)    | 13.5 (2.2)         | 12.8 (1.9)          |
| Cranial urethral volume CU <sub>v</sub> (µM <sup>3</sup> x10 <sup>4</sup> )               | 247.4 (69.5)   | 231.6 (52.8)       | 169.1 (51.5)      | 218.6 (74.1)      | 314.3 (94.1)     | 173.7 (40.7)  | 164.9 (29.3)       | 200.4 (61.7)        |
| Cranial urethral width, dorsal to ventral CU <sub>w</sub> (µM)                            | 29.3 (4.3)     | 33.1 (3.9)         | <b>19.7 (1.8)</b> | 28.4 (3.5)        | 31.1 (2.1)       | 26.8 (3.8)    | 29.2 (4.5)         | 24.2 (2.6)          |
| <b>Midway section number</b>                                                              | 4 (0.1)        | 4 (0.3)            | <i>3.2 (0.4)</i>  | 3.6 (0.2)         | 3.4 (0.4)        | 3.5 (0.4)     | 3.3 (0.5)          | 3.6 (0.2)           |
| Midway colliculus distance <b>Midway C<sub>b</sub></b> (µM)                               | 61.8 (12.1)    | 62.9 (12.4)        | 45.7 (7.3)        | 46.5 (5)          | 68.8 (9.9)       | 55.8 (8.8)    | 50.8 (9.7)         | 44.7 (7.4)          |
| Midway colliculus size <b>Midway C<sub>s</sub></b> (µM)                                   | 19.2 (3.2)     | 19.6 (4.8)         | 24.6 (3.6)        | 22.5 (1.9)        | 15.7 (2.1)       | 20.2 (3)      | 25.2 (6.4)         | 24.8 (3.1)          |
| Midway luminal area <b>Midway L<sub>A</sub></b> (µM <sup>2</sup> x10 <sup>2</sup> )       | 182.6 (67.5)   | 167.2 (71.2)       | 144.1 (50.8)      | 161 (40.2)        | 289 (96.3)       | 151.8 (48.7)  | 130.1 (49.5)       | 154.9 (45.7)        |
| Midway luminal perimeter <b>Midway L<sub>p</sub></b> (µMx10 <sup>2</sup> )                | 2.6 (0.3)      | 1.9 (0.4)          | 2.4 (0.3)         | 2.3 (0.3)         | 2.6 (0.4)        | 2.3 (0.4)     | 2.1 (0.3)          | 2.5 (0.5)           |
| Midway urethral area <b>Midway U<sub>A</sub></b> (µM <sup>2</sup> x10 <sup>2</sup> )      | 293.2 (64.7)   | 240.4 (73.7)       | 259.8 (51.2)      | 265.8 (33.7)      | 386.1 (90.3)     | 256.6 (54.6)  | 234.5 (51.2)       | 260.1 (58.6)        |
| Midway urothelium area <b>Midway UE<sub>A</sub></b> (µM <sup>2</sup> x10 <sup>2</sup> )   | 110.6 (8.8)    | <i>73.2 (7.9)</i>  | 115.7 (9)         | 104.8 (19)        | 97.1 (14.4)      | 104.9 (14.6)  | 104.4 (22.1)       | 105.2 (17.9)        |
| Midway urothelium thickness <b>Midway UE<sub>T</sub></b> (µM)                             | 6.6 (0.5)      | 5.6 (0.3)          | 5.8 (0.5)         | <i>5 (0.7)</i>    | 6.1 (0.6)        | 6.2 (0.7)     | 5.8 (0.6)          | 5.9 (0.3)           |
| Midway urethral perimeter <b>Midway U<sub>p</sub></b> (µMx10 <sup>2</sup> )               | 2.7 (0.3)      | 2.3 (0.3)          | 2.4 (0.2)         | 2.7 (0.3)         | 3 (0.3)          | 2.8 (0.4)     | 2.3 (0.2)          | 2.8 (0.4)           |
| Midway urethral lateral width <b>Midway U<sub>w</sub></b> (µM)                            | 66.6 (9.6)     | 56.2 (11.7)        | 60.4 (7.8)        | 60.7 (4.9)        | 79.8 (14.5)      | 57.3 (9.7)    | 55.2 (7.7)         | 62.1 (10.7)         |
| Prostatic urethral surface area <b>PU<sub>s</sub></b> (µM <sup>2</sup> x10 <sup>4</sup> ) | 18.9 (2)       | 17.3 (1.5)         | 16.3 (1.6)        | 16.8 (0.5)        | 18.7 (3)         | 16.3 (2)      | 15.8 (2)           | 16.9 (2.3)          |
| Prostatic urethral volume <b>PU<sub>v</sub></b> (µM <sup>3</sup> x10 <sup>4</sup> )       | 869.9 (156.7)  | 784.4 (147.4)      | 653.1 (135.1)     | 736.3 (91.5)      | 850.5 (219.2)    | 632.9 (85.5)  | 683.5 (145.2)      | 682.1 (115.2)       |
| Urethral length, cranial to caudal U <sub>l</sub> (µM)                                    | 156.5 (8.7)    | <i>125.4 (9.5)</i> | 139.2 (4.6)       | 133.2 (6.6)       | 140.9 (17.9)     | 137.7 (15.6)  | <b>125.3 (8.3)</b> | <i>131.1 (12.5)</i> |
| Urethral surface area U <sub>s</sub> (µM <sup>2</sup> x10 <sup>4</sup> )                  | 21.7 (2.3)     | 20.1 (1.6)         | 18.2 (1.7)        | 19.2 (0.9)        | 21.8 (3.5)       | 18.5 (1.9)    | 18 (2)             | 19.2 (2.5)          |
| Urethral volume U <sub>v</sub> (µM <sup>3</sup> x10 <sup>4</sup> )                        | 1116.7 (222.1) | 1016.7 (191.3)     | 822 (165.4)       | 955.1 (130.1)     | 1165.3 (309.5)   | 806.7 (106.3) | 848.2 (170.1)      | 880.8 (173.5)       |
| Urethral width, dorsal to ventral U <sub>w</sub> (µM)                                     | 74.4 (5.6)     | 70.8 (9)           | <b>50.8 (4.8)</b> | 64.4 (6.7)        | 64.5 (5.4)       | 60.8 (7.6)    | <b>58.6 (3.3)</b>  | <i>60.9 (5.4)</i>   |
| <b>Widest section number</b>                                                              | 2.5 (0.1)      | 2.6 (0.1)          | 2.2 (0.3)         | 2.3 (0.2)         | 2.2 (0.5)        | 2.3 (0.3)     | 2.3 (0.5)          | 2.5 (0.2)           |
| Widest colliculus distance <b>Widest C<sub>b</sub></b> (µM)                               | 42.3 (2.3)     | 37.2 (5.4)         | 35.9 (1.6)        | <b>31.6 (4.9)</b> | 40.3 (4.8)       | 37.4 (2.6)    | 37.9 (2.8)         | <b>31.3 (5.1)</b>   |
| Widest colliculus size <b>Widest C<sub>s</sub></b> (µM)                                   | 24.0 (1.3)     | 29.3 (4.2)         | 28.1 (1.2)        | <b>38.8 (9.9)</b> | 26.5 (3.5)       | 27.5 (2.2)    | 27.2 (2.2)         | <b>37.6 (7.3)</b>   |
| Widest luminal area <b>Widest L<sub>A</sub></b> (µM <sup>2</sup> x10 <sup>2</sup> )       | 277.2 (62.1)   | 230.2 (56.2)       | 254.3 (57.4)      | 215.6 (41.1)      | 346.2 (72.7)     | 223.5 (40.3)  | 238 (41)           | 248.2 (53.3)        |
| Widest luminal perimeter <b>Widest L<sub>p</sub></b> (µMx10 <sup>2</sup> )                | 4 (0.3)        | <i>3.5 (0.2)</i>   | 3.6 (0.2)         | <b>3.4 (0.1)</b>  | 4.1 (0.2)        | 3.6 (0.3)     | <i>3.5 (0.1)</i>   | 3.8 (0.3)           |
| Widest urethral area <b>Widest U<sub>A</sub></b> (µM <sup>2</sup> x10 <sup>2</sup> )      | 411.4 (62.4)   | 346.1 (44.8)       | 370.9 (54.3)      | 345.7 (21.8)      | 465.9 (77.2)     | 339.5 (45.1)  | 342 (38.1)         | 373.9 (51.4)        |
| Widest urothelium area <b>Widest UE<sub>A</sub></b> (µM <sup>2</sup> x10 <sup>2</sup> )   | 134.2 (6.5)    | 115.9 (12.8)       | 116.5 (4.3)       | 130.1 (25.1)      | 119.7 (6.9)      | 116 (9.2)     | <b>104 (5.3)</b>   | 125.7 (13.4)        |
| Widest urothelium thickness <b>Widest UE<sub>T</sub></b> (µM)                             | 5.2 (0.4)      | 4.5 (0.5)          | <b>4.2 (0.4)</b>  | <b>4 (0.3)</b>    | <b>4.2 (0.1)</b> | 4.6 (0.3)     | 4.4 (0.3)          | 4.9 (0.3)           |
| Widest urethral perimeter <b>Widest U<sub>p</sub></b> (µMx10 <sup>2</sup> )               | 4.3 (0.3)      | <i>3.8 (0.2)</i>   | 3.9 (0.1)         | <i>3.8 (0.1)</i>  | 4.3 (0.2)        | 3.9 (0.3)     | <i>3.8 (0.1)</i>   | 4 (0.3)             |
| Widest urethral lateral width <b>Widest U<sub>w</sub></b> (µM)                            | 104.7 (8.7)    | 94.6 (5.8)         | 96.8 (6.1)        | 91.5 (2)          | 109.8 (11.5)     | 90.8 (8.4)    | 88.4 (4.4)         | 99.4 (8.4)          |

 Means (SEM) with *p*≤0.1 (italics), *p*≤0.05 (bold), *p*≤0.01 (italics and bold)



Supplemental Table 4: Litter Size Means

|                 | Animal # | VEH CTL         | µg/kg BPA     |             |                 |                 |               | µg/kg EE2       |                 |
|-----------------|----------|-----------------|---------------|-------------|-----------------|-----------------|---------------|-----------------|-----------------|
|                 |          |                 | 2.5           | 25          | 250             | 2500            | 25000         | 0.05            | 0.5             |
| Litter Size     | 1        | 13              | 14            | 14          | 13              | 15              | 15            | 15              | 15              |
|                 | 2        | 14              | 11            | 16          | 14              | 14              | 16            | 14              | 15              |
|                 | 3        | 16              | 17            | 14          | 14              | 16              | 15            | 11              | 12              |
|                 | 4        | 13              | 15            | 15          | 16              | N/A             | 12            | 12              | 13              |
|                 | 5        | 14              | 14            | 16          | 11              | 15              | 15            | 15              | 12              |
|                 | 6        | 12              | N/A           | 11          | 18              | N/A             | 12            | 14              | 17              |
|                 |          | 14±1            | 14±2          | 14±2        | 14±2            | 15±1            | 14±2          | 14±2            | 14±2            |
| Sex Ratio (M/F) | 1        | 6/7             | N/A           | 7/7         | 7/6             | N/A             | 7/8           | 7/8             | 8/7             |
|                 | 2        | 8/6             | 6/5           | N/A         | 8/6             | 7/7             | N/A           | 7/7             | N/A             |
|                 | 3        | 8/8             | 8/9           | 7/7         | 7/7             | 7/9             | 7/8           | 6/5             | 6/6             |
|                 | 4        | 7/6             | 8/7           | 7/8         | 7/9             | N/A             | 7/5           | 6/6             | 7/6             |
|                 | 5        | 8/6             | 8/6           | 8/8         | 6/5             | 8/7             | 7/8           | 7/8             | 9/3             |
|                 | 6        | 7/5             | N/A           | 6/5         | 8/10            | N/A             | 6/6           | 7/7             | 8/9             |
|                 |          | 7.6±0.8/6.3±1.0 | 7.5±1/6.8±1.7 | 7±0.7/7±1.2 | 7.2±0.8/7.2±1.9 | 7.3±0.6/7.7±1.2 | 6.8±0.4/7±1.4 | 6.7±0.5/6.8±1.3 | 7.6±1.1/7.4±2.2 |
| Dam GD21 BW     | 1        | 442.9           | 500.3         | 466.2       | 442.9           | 434.3           | 437.0         | 387.3           | 445.0           |
|                 | 2        | 403.4           | 372.5         | 391.6       | 409.7           | 445.3           | 432.6         | 407.8           | 468.9           |
|                 | 3        | 344.5           | 405.3         | 442.9       | 434.9           | 453.1           | 387.6         | 409.8           | 368.5           |
|                 | 4        | 442.6           | 465.5         | 481.4       | 446.3           | 374.0           | 381.4         | 417.1           | 481.7           |
|                 | 5        | 352.3           | 406.9         | 421.8       | 474.2           | 443.6           | 367.1         | 446.1           | 384.3           |
|                 | 6        | 331.5           | N/A           | 454.4       | 388.5           | N/A             | 386.9         | 411.7           | 429.3           |
|                 |          | 386.2±50.1      | 430.1±51.6    | *443.1±32.4 | *432.8±30.0     | 430.1±32.0      | 398.8±28.9    | 413.3±19.0      | 429.6±45.4      |
| Mean Litter BW  | 1        | 8.4             | 7.8           | 7.4         | 7.3             | 5.9             | 8.9           | 5.3             | 7.4             |
|                 | 2        | 5.8             | 6.5           | 5.9         | 6.6             | 9.4             | 6.7           | 6.2             | 7.0             |
|                 | 3        | 3.7             | 5.2           | 7.3         | 7.5             | 7.2             | 7.0           | 9.0             | 6.0             |
|                 | 4        | 7.6             | 7.5           | 8.6         | 7.6             | N/A             | 6.6           | 8.5             | 10.0            |
|                 | 5        | 4.2             | 6.0           | 6.6         | 10.0            | 7.1             | 4.9           | 5.3             | 7.1             |
|                 | 6        | 5.7             | N/A           | 9.8         | 5.0             | N/A             | 7.4           | 6.6             | 5.7             |
|                 |          | 5.9±1.9         | 6.6±1.1       | 7.5±1.5     | 7.3±1.6         | 7.4±1.4         | 6.9±1.3       | 6.8±1.6         | 7.2±1.5         |

Mean±SEM \*p&lt;0.05, N/A: Not Available or Data Not Provided

Supplemental Table 5: Cumulative Litter Information

| Animal # | Treatment      | Load # | Litter of Origin | Dam GD21 BW (g) | Dam PND0 BW (g) | GD21-PND0 (g) | Litter Size | Mean Pup BW (g) | Pup BW (g) | Sex Ratio (#male/#females) |
|----------|----------------|--------|------------------|-----------------|-----------------|---------------|-------------|-----------------|------------|----------------------------|
| 1        | Veh-Cont       | 2      | 246              | 442.9           | 333.5           | 109.4         | 13          | 8.42            | 6.4        | 6/7                        |
| 2        | Veh-Cont       | 2      | 252              | 403.4           | 321.8           | 81.6          | 14          | 5.83            | 5.9        | 8/6                        |
| 3        | Veh-Cont       | 3      | 254              | 344.5           | 285.6           | 58.9          | 16          | 3.68            | 7.1        | 8/8                        |
| 4        | Veh-Cont       | 4      | 483              | 442.6           | 343.5           | 99.1          | 13          | 7.62            | 6.5        | 7/6                        |
| 5        | Veh-Cont       | 2      | 495              | 352.3           | 293.1           | 59.2          | 14          | 4.23            | 5.5        | 8/6                        |
| 6        | Veh-Cont       | 3      | 725              | 331.5           | 263.1           | 68.4          | 12          | 5.70            | 5.4        | 7/5                        |
| 1        | 2.5ug/kg BPA   | 4      | 263              | 500.3           | 391.3           | 109           | 14          | 7.79            | 7.1        | 6/5 + 3 undetermined       |
| 2        | 2.5ug/kg BPA   | 2      | 267              | 372.5           | 301.2           | 71.3          | 11          | 6.48            | 8.1        | 6/5                        |
| 3        | 2.5ug/kg BPA   | 4      | 499              | 405.3           | 316.2           | 89.1          | 17          | 5.24            | 6.3        | 8/9                        |
| 4        | 2.5ug/kg BPA   | 3      | 743              | 465.5           | 352.9           | 112.6         | 15          | 7.51            | 6          | 8/7                        |
| 5        | 2.5ug/kg BPA   | 2      | 746              | 406.9           | 323             | 83.9          | 14          | 5.99            | 7.5        | 8/6                        |
| 1        | 25ug/kg BPA    | 2      | 275              | 466.2           | 362.8           | 103.4         | 14          | 7.39            | 7.7        | 7/7                        |
| 2        | 25ug/kg BPA    | 3      | 278              | 391.6           | 303.9           | 87.7          | 16          | 5.48            | 6.8        | 8/7 + 1 undetermined       |
| 3        | 25ug/kg BPA    | 3      | 516              | 442.9           | 341             | 101.9         | 14          | 7.28            | 7.1        | 7/7                        |
| 4        | 25ug/kg BPA    | 3      | 517              | 481.4           | 352.9           | 128.5         | 15          | 8.57            | 6.8        | 7/8                        |
| 5        | 25ug/kg BPA    | 2      | 527              | 421.8           | 315.5           | 106.3         | 16          | 6.64            | 7.2        | 8/8                        |
| 6        | 25ug/kg BPA    | 4      | 755              | 454.4           | 346.8           | 107.6         | 11          | 9.78            | 6.6        | 6/5                        |
| 1        | 250ug/kg BPA   | 4      | 294              | 442.9           | 348             | 94.9          | 13          | 7.30            | 6.6        | 7/6                        |
| 2        | 250ug/kg BPA   | 2      | 298              | 409.7           | 317.9           | 91.8          | 14          | 6.56            | 7.5        | 8/6                        |
| 3        | 250ug/kg BPA   | 3      | 303              | 434.9           | 329.3           | 105.6         | 14          | 7.54            | 7.8        | 7/7                        |
| 4        | 250ug/kg BPA   | 2      | 534              | 446.3           | 324             | 122.3         | 16          | 7.64            | 6.9        | 7/9                        |
| 5        | 250ug/kg BPA   | 2      | 768              | 474.2           | 364.2           | 110           | 11          | 10.00           | 7.5        | 6/5                        |
| 6        | 250ug/kg BPA   | 4      | 776              | 388.5           | 298.1           | 90.4          | 18          | 5.02            | 6.8        | 8/10                       |
| 1        | 2500ug/kg BPA  | 2      | 315              | 434.3           | 345.3           | 89            | 15          | 5.93            | 5.9        | 7/7 + 1 undetermined       |
| 2        | 2500ug/kg BPA  | 2      | 317              | 445.3           | 314.3           | 131           | 14          | 9.36            | 6.9        | 7/7                        |
| 3        | 2500ug/kg BPA  | 2      | 320              | 453.1           | 338.2           | 114.9         | 16          | 7.18            | 6.9        | 7/9                        |
| 4        | 2500ug/kg BPA  | 2      | 321              | 374             | 299.3           | 74.7          | N/A         | N/A             | 5.8        | N/A                        |
| 5        | 2500ug/kg BPA  | 2      | 324              | 443.6           | 337.9           | 105.7         | 15          | 7.05            | 6.3        | 8/7                        |
| 1        | 25000ug/kg BPA | 2      | 330              | 437             | 303.8           | 133.2         | 15          | 8.88            | 7          | 7/8                        |
| 2        | 25000ug/kg BPA | 3      | 337              | 432.6           | 325.6           | 107           | 16          | 6.69            | 5.2        | 8/7 + 1 undetermined       |
| 3        | 25000ug/kg BPA | 2      | 342              | 387.6           | 281.8           | 105.8         | 15          | 7.05            | 6          | 7/8                        |
| 4        | 25000ug/kg BPA | 3      | 567              | 381.4           | 302.6           | 78.8          | 12          | 6.57            | 7.4        | 7/5                        |
| 5        | 25000ug/kg BPA | 2      | 582              | 367.1           | 293.6           | 73.5          | 15          | 4.90            | 7          | 7/8                        |
| 6        | 25000ug/kg BPA | 4      | 808              | 386.9           | 298.3           | 88.6          | 12          | 7.38            | 7.8        | 6/6                        |
| 1        | 0.05ug/kg EE2  | 4      | 344              | 387.3           | 307.4           | 79.9          | 15          | 5.33            | 6.7        | 7/8                        |
| 2        | 0.05ug/kg EE2  | 2      | 345              | 407.8           | 321.7           | 86.1          | 14          | 6.15            | 7          | 7/7                        |
| 3        | 0.05ug/kg EE2  | 2      | 350              | 409.8           | 310.8           | 99            | 11          | 9.00            | 7.4        | 6/5                        |
| 4        | 0.05ug/kg EE2  | 5      | 814              | 417.1           | 315.1           | 102           | 12          | 8.50            | 6.8        | 6/6                        |
| 5        | 0.05ug/kg EE2  | 2      | 816              | 446.1           | 366.7           | 79.4          | 15          | 5.29            | 7          | 7/8                        |
| 6        | 0.05ug/kg EE2  | 4      | 938              | 411.7           | 318.8           | 92.9          | 14          | 6.64            | 6.6        | 7/7                        |
| 1        | 0.5ug/kg EE2   | 2      | 353              | 445             | 334             | 111           | 15          | 7.40            | 7.6        | 8/7                        |
| 2        | 0.5ug/kg EE2   | 4      | 834              | 468.9           | 363.6           | 105.3         | 15          | 7.02            | 6.5        | 6/7 + 2 undetermined       |
| 3        | 0.5ug/kg EE2   | 4      | 838              | 368.5           | 296.1           | 72.4          | 12          | 6.03            | 5.8        | 6/6                        |
| 4        | 0.5ug/kg EE2   | 5      | 955              | 481.7           | 351.7           | 130           | 13          | 10.00           | 7.8        | 7/6                        |
| 5        | 0.5ug/kg EE2   | 5      | 956              | 384.3           | 298.8           | 85.5          | 12          | 7.13            | 7.1        | 9/3                        |
| 6        | 0.5ug/kg EE2   | 5      | 959              | 429.3           | 331.7           | 97.6          | 17          | 5.74            | 6.9        | 8/9                        |
